# Supplementary material for: Comparative Study of the Myocardium of Patients from Four COVID-19 Waves
Source: MDPI journal article supplement (doi:10.3390/diagnostics13091645), 2023-05-07
Supplement: s1 [file s1]

## Appendix S2

### Clinical and laboratory parameters of deceased patients with immunohistochemical diagnosis of viral myocarditis

| № | Gender, age | Anamnestic data and symptoms till the moment of hospitalization                                                              | Laboratory data                                                                                                                                                 | Simpson left ventricular ejection fraction | Lung lesions on computed tomography till the moment of hospitalization (in %) | Concomitant pathology                                                                   | Arrhythmias and conduction disorders             |
|---|-------------|------------------------------------------------------------------------------------------------------------------------------|-----------------------------------------------------------------------------------------------------------------------------------------------------------------|--------------------------------------------|-------------------------------------------------------------------------------|-----------------------------------------------------------------------------------------|--------------------------------------------------|
| 1 | F, 62       | Dry cough<br>Chest congestion<br>Dyspnea<br>Anosmia<br>Time from onset of symptoms and until staying in hospital was 4 days  | CRP 50 (mg/l)<br>Lymphocytes 0•56 x10 <sup>9</sup> /l<br>D-dimer 4900 (ng/ml)<br>Procalcitonin 0•072 (ng/ml)<br>Troponin 0•39 (ng/ml)                           | Not carried out                            | 90%                                                                           | Type 2 diabetes<br>Hypertensive heart disease<br>Chronic obstructive pulmonary disease  | Left Anterior Fascicular Block                   |
| 2 | M, 71       | Dry cough<br>Diarrhea<br>Tiredness<br>Time from onset of symptoms and until staying in hospital was 4 days                   | Ferritin 3175 (mcg/l)<br>CRP 155 (mg/l)<br>Lymphocytes 0•6 x10 <sup>9</sup> /l<br>D-dimer 1475 (ng/ml)<br>Procalcitonin 0•45 (ng/ml)<br>Troponin 15•0 (ng/ml)   | 47%                                        | 85%                                                                           | Type 2 diabetes<br>Hypertensive heart disease<br>Myocardial ischemia                    | Atrial extrasystole                              |
| 3 | M, 61       | Chest congestion<br>Dyspnea<br>No information about symptoms                                                                 | Ferritin 2000 (mcg/l)<br>CRP 250 (mg/l)<br>Lymphocytes 0•7 x10 <sup>9</sup> /l<br>D-dimer 1160 (ng/ml)<br>Procalcitonin 0•94 (ng/ml)<br>Troponin 0•74 (ng/ml)   | Not carried out                            | 80%                                                                           | Type 2 diabetes<br>Hypertensive heart disease<br>Myocardial ischemia                    | Atrial fibrillation<br>Ventricular extrasystoles |
| 4 | F, 82       | No information due to extremely serious condition                                                                            | Ferritin 378 (mcg/l)<br>CRP 94 (mg/l)<br>Lymphocytes 0•8 x10 <sup>9</sup> /l<br>D-dimer 700 (ng/ml)<br>Procalcitonin 3•96 (ng/ml)<br>Troponin 2•97 (ng/ml)      | 30%                                        | 10%                                                                           | Hypertensive heart disease<br>Cerebrovascular disease                                   | Absent                                           |
| 5 | M, 59       | Dry cough<br>Chest congestion<br>Dyspnea<br>Sweating<br>Time from onset of symptoms and until staying in hospital was 3 days | Ferritin 420 (mcg/l)<br>CRP 390 (mg/l)<br>Lymphocytes 0•03 x10 <sup>9</sup> /l<br>D-dimer 1550 (ng/ml)<br>Procalcitonin 0•05 (ng/ml)<br>Troponin 0•02 (ng/ml)   | Not carried out                            | 85%                                                                           | Hypertensive heart disease<br>Pulmonary sarcoidosis                                     | Right Bundle Branch Block                        |
| 6 | M, 62       | Tiredness<br>Dry cough<br>No information about symptoms                                                                      | Ferritin 2000 (mcg/l)<br>CRP 81•4 (mg/l)<br>Lymphocytes 1•58 x10 <sup>9</sup> /l<br>D-dimer 1470 (ng/ml)<br>Procalcitonin 0•42 (ng/ml)<br>Troponin 1•21 (ng/ml) | Not carried out                            | 70%                                                                           | Hypertensive heart disease<br>Myocardial ischemia<br>Cerebrovascular disease<br>Obesity | Right Bundle Branch Block                        |
| 7 | F, 68       | No information due to extremely serious condition                                                                            | CRP 161 (mg/l)<br>Lymphocytes 0•57 x10 <sup>9</sup> /l                                                                                                          | Not carried out                            | 64%                                                                           | Hypertensive heart disease                                                              | Right Bundle Branch Block<br>Atrial fibrillation |

|    |       |                                                                                                                                                        |                                                                                                                                                                    |                 |                 |                                                                                                 |                                                                                    |
|----|-------|--------------------------------------------------------------------------------------------------------------------------------------------------------|--------------------------------------------------------------------------------------------------------------------------------------------------------------------|-----------------|-----------------|-------------------------------------------------------------------------------------------------|------------------------------------------------------------------------------------|
|    |       |                                                                                                                                                        | D-dimer 1300 (ng/ml)<br>Procalcitonin 0•35 (ng/ml)<br>Troponin 0•12 (ng/ml)                                                                                        |                 |                 | Myocardial ischemia                                                                             |                                                                                    |
| 8  | F, 59 | Tiredness<br>Dry cough<br>Dyspnea<br>Headache<br>Time from onset of symptoms and until staying in hospital was 12 days                                 | Ferritin 492 (mcg/l)<br>CRP 41 (mg/l)<br>Lymphocytes 0•43 x10 <sup>9</sup> /l<br>D-dimer 3060 (ng/ml)<br>Procalcitonin 4•51 (ng/ml)<br>Troponin 0•1 (ng/ml)        | 70%             | 90%             | Type 2 diabetes<br>Hypertensive heart disease                                                   | Right Bundle Branch Block<br>Atrial fibrillation                                   |
| 9  | V, 58 | Wet cough<br>Dyspnea<br>Tiredness<br>Chest congestion<br>Time from onset of symptoms and until staying in hospital was 7 days                          | Ferritin 1124 (mcg/l)<br>CRP 113•12 (mg/l)<br>Lymphocytes 0•48 x10 <sup>9</sup> /l<br>D-dimer 1000 (ng/ml)<br>Procalcitonin 0 (ng/ml)<br>Troponin 0•1 (ng/ml)      | 65              | 75              | Absent                                                                                          | Absent                                                                             |
| 10 | V, 73 | Wet cough<br>Tiredness<br>Diarrhea<br>Dyspnea<br>Sore throat, nasal congestion<br>Time from onset of symptoms and until staying in hospital was 5 days | Ferritin 1233 (mcg/l)<br>CRP 170•63 (mg/l)<br>Lymphocytes 1•32 x10 <sup>9</sup> /l<br>D-dimer 440 (ng/ml)<br>Procalcitonin 0•623 (ng/ml)<br>Troponin 0•1 (ng/ml)   | Not carried out | 56              | Hypertensive heart disease<br>Myocardial ischemia<br>Rheumatoid arthritis                       | Absent                                                                             |
| 11 | V, 84 | Wet cough<br>Tiredness<br>Headache<br>Dyspnea<br>Time from onset of symptoms and until staying in hospital was 7 days                                  | Ferritin 106 (mcg/l)<br>CRP 50•49 (mg/l)<br>Lymphocytes 0•61 x10 <sup>9</sup> /l<br>D-dimer 350 (ng/ml)<br>Procalcitonin 0•148 (ng/ml)<br>Troponin 0•1 (ng/ml)     | 48              | 65              | Hypertensive heart disease<br>Myocardial ischemia<br>Type 2 diabetes                            | Atrial fibrillation                                                                |
| 12 | V, 86 | Wet cough<br>Tiredness<br>Headache<br>Dyspnea<br>Sweating<br>Time from onset of symptoms and until staying in hospital was 8 days                      | Ferritin 419•5 (mcg/l)<br>CRP 34•69 (mg/l)<br>Lymphocytes 0•83 x10 <sup>9</sup> /l<br>D-dimer 210 (ng/ml)<br>Procalcitonin 0•083 (ng/ml)<br>Troponin 0•157 (ng/ml) | 55              | 20              | Hypertensive heart disease<br>Myocardial ischemia<br>Type 2 diabetes<br>Cerebrovascular disease | Atrial fibrillation<br>Ventricular extrasystoles<br>Left Anterior Fascicular Block |
| 13 | V, 82 | Wet cough<br>Tiredness<br>Nasal congestion<br>Dyspnea<br>Time from onset of symptoms and until staying in hospital was 11 days                         | Ferritin 263•3 (mcg/l)<br>CRP 25•7 (mg/l)<br>Lymphocytes 0•25 x10 <sup>9</sup> /l<br>D-dimer 190 (ng/ml)<br>Procalcitonin 0•033 (ng/ml)<br>Troponin 0•668 (ng/ml)  | 70              | 60              | Hypertensive heart disease<br>Myocardial ischemia<br>Type 2 diabetes                            | Absent                                                                             |
| 14 | V, 59 | Dyspnea<br>Tiredness<br>Edema of the legs and face<br>Time from onset of symptoms and until staying in hospital was 12 days                            | CRP 27•8 (mg/l)<br>Lymphocytes 0•72 x10 <sup>9</sup> /l<br>D-dimer 15092 (ng/ml)<br>Procalcitonin 4•77 (ng/ml)<br>Troponin 0•059 (ng/ml)                           | 55              | Not carried out |                                                                                                 | Atrial fibrillation                                                                |
