# Supplementary material for: Comparative Study of the Myocardium of Patients from Four COVID-19 Waves
Source: Diagnostics (Basel). 2023 May 7;13(9):1645. doi: 10.3390/diagnostics13091645 (PMC10178873; doi:10.3390/diagnostics13091645)
Supplement: Supplementary file 1 [file diagnostics-13-01645-s001.zip › Appendix S1 data of clinic and morphology of three wave COVID.xlsx]

## Sheet: wave 1, clinic
N	Sex	Duration for onset of symptoms	Death per sick day	Invasive ventilation	Age, years	CRP, mg/l	Procalcitonin, ng/ml	Ferritin, mcg/l	D-dimer, mcg/ml	Troponin I, ng/ml	Lymphocytes, x10^9/l	%spO2	%CT	Ejection fraction %	Hypertensive heart disease	Chronic heart failure	Atrial fibrillation	Conduction blocks	Extrasystoles	Acute kidney injury	Cardiac ischemia	Diabetes	Cerebrovascular accident	Oncological diseases	Cerebrovascular disease	Others
Patients without myocarditis
1	F		10	0	62	405.39	5.28	2000		0.04	0.69	92		74	2	0	0	Right bundle branch block	0	0	0	0	0	0	0	0
2	M		13	0	80	57.45	0.07	2000	0.69	0.04	0.55	97	85	68	3	2	1	Sick sinus syndrome	Ventricular extrasystole	0	1	0	0	0	0	0
3	F		13	1	80	399.83	0.862	2000	1.35	0.28	0.59	97	85	60	3	2	1	Sinoatrial block	0	0	0	0	0	0	0	0
4	M	9	14	0	85	148.61	0.214	526.5	1.32	0.13	0.33	89	40	50	2	0	1	AV block type 2	0	0	0	0	0	0	0	0
5	F	0	16	0	80		3.25	260		0.67	0.63	48	20	57	2	1	1	AV block type 2	0	0	1	0	0	0	0	0
6	F	4	7	0	83	193.04	0.517	1891	2.71	0.21	0.58	84	75	60	3	3	1	0	Ventricular extrasystole	0	0	0	0	0	0	0
7	M	2	18	0	81	163.02	0.528	238.2	4.34	0.06	0.7	94	12	47	3	3	1	0	0	0	1	0	0	0	1	End-stage renal disease
8	F	5	11	1	74	17.34	0.141	1972	1.73	1.613	0.62		92	38	3	3	1	0	0	0	1	1	0	0	1	0
9	F	5	18	1	56	244.71	5.38	3880	2.97	0.02	0.12	98	35	54	0	0	0	0	0	0	0	0	0	Multiple myeloma	0	0
10	F	2	23	1	81	48.5	3.24	1897	0.79	0.23	1.35	96	5	56	3	2	0	0	0	0	1	0	0	0	0	0
11	M		6	1	86	92.95				0.06		90	20		3	3	1	0	0	0	1	0	0	Liver cancer	1	0
12	F		15	0	82	143.49		1880	2.45	0.02	0.8	96	90	36	3	2	1	Left bundle branch block	0	0	0	0	0	Breast cancer	0	0
13	M		31	1	50	5.29	1.15	2000	3.31	0.2	1.91	97	90		0	0	0	0	0	0	0	0	0	Chronic lymphocytic leukemia	0	0
14	F		31	1	50	0.84	0.486	663	1.48	0.16	0.54	97	90	76	0	0	0	0	0	0	0	0	0	0	0	0
15	F	6	23	0	68	453.07	2.26	1159	2.42	1.76	0.47		85	28	3	0	0	0	0	0	1	0	0	0	1	Acute myocardial infarction
16	M	2	25	1	80	19.7	0.166	379.4	4.38	0.62	0.21	98	80	41	3	3	0	0	0	0	1	0	0	0	0	Acute myocardial infarction
17	M	4	10	0	36	49.1	5.02	2198.5	1.66	0.54	0.42	98	60	60	0	0	0	0	0	0	0	0	0	Hodgkin's lymphoma, stomach cancer	0	0
18	M	16	35	0	81	106.94	1.84	280.9	0.42	0.05	0.48	98	24	64	3	2	0	0	0	0	1	0	0	0	1	0
19	F	3	25	0	76	0.89	0.372	741.7	2.45	0.6	0.54		80	48	3	2	1	0	0	1	1	0	0	0	0	Acute myocardial infarction
20	F	3	61	0	50	108.25	0.136	2000	0.95	0.03	0.65	88	96	70	0	0	0	0	0	0	0	0	0	Non-Hodgkin's lymphoma	0	0
21	M		33	0	89	197.62		1122	3	0.04	1.2	91		55	3	2	1	0	0	0	1	0	0	0	1	0
22	F		22	0	50	12.07	0.052	93.03	6.7	0.32	1.5	86	85	36	3	0	0	0	0	0	0	0	1	0	0	0
23	M	12	43	1	67	214.38	5.3	2000	0.68	0.07	0.18	96	92		3	0	0	0	0	0	0	0	1	0	0	0
24	F	3	12	0	66	60.57	0.43	1567		0.04	0.27	96	84	64	3	2	0	0	0	0	1	0	0	0	1	Chronic obstructive pulmonary disease
25	M		20	1	69	124.51	5	2000	1.5		1.63	89	85	70	2	0	0	0	0	0	0	1	0	0	0	0
26	F		13	0	56	4.2	0.12	441.5	0.82	0.03	0.55	70	80	70	0	0	0	0	0	0	0	0	0	0	0	0
27	M		14	0	69	60.56	0.094	88.38	0.57	0.03	0.62	76	32	65	3	3	1	0	0	0	0	0	0	0	0	0
28	M	12	27	0	34	350	0.821	2000	5.23	1.05	0.17		15	54	0	0	0	0	0	0	0	0	0	Acute lymphoblastic leukemia	0	0
29	M	0	4	0	83	211.36	2.232	1698	1.88	0.57				55	3	3	1	0	0	0	1	0	0	0	1	End-stage renal disease
30	F	3	23	1	81	247.37	0.357	736.1	2.37	0.06	1.52	65	80	65	0	0	0	0	0	0	0	0	0	0	0	0
31	F	8	18	0	78	446.73	4.25	1043		0.51	0.45		84	67	3	3	1	Sick sinus syndrome	0	0	1	0	0	0	0	0
32	M	8	18	0	38	101.53	0.167			0.01	1.71	91		65	0	0	0	0	0	0	0	0	0	Breast cancer	0	0
33	F	3	18	0	71		0.45	3175		0.2	0.6	93	85	47	3	0	0	Left bundle branch block	0	0	1	1	0	0	0	0
34	M	5	40	1	57	165.54	0.06	1544		0.07	0.93		100	67	3	2	1	0	Ventricular extrasystole	0	1	1	0	0	0	0
35	F	7	18	0	68		0.45	1738		0.43	0.48	87	90	66	0	0	0	0	0	0	1	0	0	0	0	0
36	F	15	18	0	87	55.95	0.471	993		0.19	1.26	92		70	3	2	1	0	0	0	1	0	0	0	0	0
37	M		20	0	55		0.45	1107.7		0.2	0.5	82	75	65	0	0	0	0	0	0	0	0	0	0	0	0
38	F		6	0	86	222.02	3.95		2.43	3.57		88		37	3	3	1	0	0	0	1	1	0	0	1	0
39	M	8	24	0	58	15.67	0.136	852.5	1.03	0.2	2.21	97	15	67	0	0	0	0	0	0	0	0	0	0	0	0
40	F	6	30	1	53	10.37	0.225	2000	3.07	0.13	0.78	61	80	70	3	0	0	0	0	0	0	1	0	0	0	0
41	F	4	16	0	90	135.34	0.277		1.12	2.23	1.01	72	55	57	3	0	0	0	0	0	1	0	0	0	0	Acute myocardial infarction
42	M		3	0	66	88.9	2.34	2000	1.91	1.314	0.54		10	24	3	2	1	0	0	0	1	0	0	0	0	Acute myocardial infarction
43	F	8	41	1	66	10.28	0.082	530.1	1.48	0	0.93	95	80	59	3	3	1	0	0	0	1	1	0	0	1	0
44	M		29	1	66	161.05	4.11	2000	0.58	0.12	1.23	87	60	56	3	2	0	0	0	0	1	0	0	0	1	HIV infection
45	F		20	1	76	144.09	4.259	1911.3	3.48	0.21	1.13	92	100		2	0	0	Left bundle branch block	0	0	0	0	0	0	0	0
46	M	3	14	1	76	124.6			4.18	0.04	0.74		95	45	3	2	1	0	0	0	1	1	0	0	1	Cirrhosis of the liver
47	F		34	1	62	16.39	0.138	846	3.67	0.19	0.52	72	75	60	3	0	0	0	0	0	1	0	0	0	0	0
48	M		5	0	73			8200		0.34	0.59	94	65	40	3	0	0	0	0	0	0	1	0	0	1	0
49	F	11	35	0	68	128.97	0.06	1049	0.94	0.02	0.91	93	76	51	2	2	1	0	0	0	0	0	0	0	0	0
50	F		9	0	85		0.45	74		0.2	1.02	83	40	65	0	0	0	0	0	0	0	0	0	0	0	0
51	M		3	1	41	12.06			6.64	0.52		97	0		0	0	0	0	0	0	1	0	0	0	0	Acute myocardial infarction
52	F	6	15	0	44		0.45	249.7		0.2	0.83	94	35	65	0	0	0	0	0	0	0	0	0	0	0	Cirrhosis of the liver
53	F		8	1	75		0.45	328		0.2	0.41	87	75	60	3	3	1	0	0	0	1	0	0	Cervical cancer, breast cancer	1	0
54	F	2	14	0	90	69.55	1.89	1032	3.93	0.44	0.97	98	75	40	3	2	0	AV block type 3	0	0	1	1	0	0	0	0
55	F		14	1	86			3695		2.44	1.41	86	60	52	3	3	1	0	Ventricular extrasystole	0	1	0	0	0	0	0
56	F	5	19	0	94	118.3	2.36	276.3	2.61	0.25	0.52	92		41	3	0	1	0	0	0	1	0	0	0	1	0
57	M		22	1	60			1444.3		0.2	1.65	94	30	66	3	0	0	0	0	0	1	0	0	0	0	0
58	F		36	1	77	260.09	0.132	1347	1.24	0.17	0.36	95	96	60	3	0	1	0	0	0	1	1	0	0	1	0
59	M	1	10	1	66		1	276		0.45	1.16		50	43	2	2	1	Right bundle branch block	0	0	0	0	0	0	1	0
60	F	3	16	0	81	192.54	1.478	197.6	2.31	0.03	0.47	95	90	60	3	0	1	0	Ventricular extrasystole	0	1	0	0	0	0	Acute myocardial infarction
61	F	0	10	1	79		0.45	535		4.4	0.68	54		65	0	0	0	0	0	0	0	0	0	0	0	0
62	F	0	11	1	47	67.53	4.78	1733.7	1.11	0.09				65	3	0	0	0	0	0	0	0	0	0	0	0
63	F	4	16	1	58			926		1	0.72	94	30	67	3	0	0	0	Ventricular extrasystole	0	1	0	0	0	1	0
64	M		6	0	82	18.53	0.14	961.4	0.71	0.02	0.49	92	70	60	3	2	1	AV block type 2	0	0	0	0	0	0	1	Chronic obstructive pulmonary disease
65	M	32	59	0	75	159.02	2.11	2000	2.42	0.13	0.37	91	50	55	3	0	0	0	0	0	0	0	0	0	1	0
66	M	5	17	1	64	110.55	3.97	358.1	2.09	0.19	0.63	67	80	62	2	0	0	0	0	0	0	0	0	0	0	0
67	M		10	0	76	115.27	5.15	2239	4.59	0.51	3.8	67	75	64	3	0	0	Right bundle branch block	0	1	1	0	0	0	0	0
68	F		5	0	84	162.46		304.1	0.77	5.04		68	35	56	3	0	0	0	0	0	1	0	0	0	1	Acute myocardial infarction
69	M	11	24	0	83	10.61	0.529	494.6	3.01	0.01	2.97	97	80	56	3	2	0	0	0	0	1	0	0	Acute myeloid leukemia, breast cancer	0	0
Descriptive statistics															n, %	n, %	n, %	n, %	n, %	n, %	n, %	n, %	n, %	n, %	n, %	n, %
Volume samples, n		41	69	69	69	56	59	63	49	68	63	58	60	64	Stage III	Stage III	Present	Right bundle branch block	Ventricular extrasystole	Present	Present	Present	Present	Multiple myeloma	Present	Acute myocardial infarction
Minimum		0	3		34	0.84	0.052	74	0.42	0	0.12	48	0	24	45	12	28	3	6	2	37	11	2	1	21	8
Maximum		32	61		94	453.07	5.38	3695	6.7	5.04	3.8	98	100	76	0.652174	0.173913	0.405797	0.0434783	0.0869565	0.0289855	0.536232	0.15942	0.0289855	0.0144928	0.304348	0.115942
Arithmetic mean M		6	19.5217	0.41	69.942	129.732	1.56834	1689.91	2.31612	0.529515	0.869841	87.4655	63.8833	56.8125	Stage II	Stage II	Absent	Sick sinus syndrome	Without extrasystoles	Absent	Absent	Absent	Absent	Liver cancer	Absent	Chronic obstructive pulmonary disease
Standard deviation sd		5.74891	11.9602		14.6055	115.344	1.79504	2251.51	1.52473	0.970991	0.645837	11.9652	28.5088	11.5221	8	18	41	2	63	67	32	58	67	1	48	2
Confidence interval 95% CI		1.81458	2.87316		3.50862	30.8894	0.467791	567.036	0.437953	0.23503	0.162652	3.14608	7.36459	2.87813	0.115942	0.26087	0.594203	0.0289855	0.913043	0.971014	0.463768	0.84058	0.971014	0.0144928	0.695652	0.0289855
Sample median Me		5	18		74	112.91	0.486	1159	2.09	0.2	0.63	92	75	60	Stage I	Stage I		Sinoatrial block						Breast cancer		Cirrhosis of the liver
Percentile 25%		3	11		60	41.3	0.1905	510.55	1.11	0.0575	0.495	86	38.75	50.75	0	1		1						4		2
Percentile 75%		8	24		81	172.29	2.35	2000	3.01	0.51	1.075	96	85	65	0	0.0144928		0.0144928						0.057971		0.0289855
95% lower confidence limit Me		3	14		66	60.57	1.84	846	2.71	0.13	0.55	88	60	55	Without hypertension	Without heart failure		Left bundle branch block						Chronic lymphocytic leukemia		End-stage renal disease
95% upper confidence limit Me		6	20		79	144.09	0.45	1880	1.48	0.23	0.8	94	80	64	16	38		3						1		2
Coefficient of variation CV=sd/M [0,1]		0.958152	0.612663		0.208823	0.889098	1.14455	1.33232	0.65831	1.83374	0.742476	0.136799	0.446263	0.202809	0.231884	0.550725		0.0434783						0.0144928		0.0289855
Root mean square error m [0.5]		0.897829	1.43984		1.75829	15.4135	0.233695	283.664	0.217818	0.11775	0.0813678	1.5711	3.68046	1.44026				AV block type 2						Hodgkin's lymphoma		HIV infection
Asymmetry As [±0.2]		2.56953	1.31718		-0.66842	1.21096	1.04187	3.80374	1.09563	3.19086	2.31153	-1.58938	-0.758531	-0.856579				3						1		1
Extsess Ex [±1]		9.65902	2.29916		-0.355368	1.22919	-0.444003	16.3654	1.02206	10.6578	7.16547	1.8852	-0.760485	0.184907				0.0434783						0.0144928		0.0144928
M+sd		11.7489	31.482		84.5475	245.076	3.36338	3941.43	3.84085	1.50051	1.51568	99.4307	92.3921	68.3346				AV block type 3						Stomach cancer		Without others diseases
Percentile 84%		10.2	31		83.12	215.908	4.0708	2000	3.7532	0.634	1.3548	97	90	67				1						1		54
M-sd		0.251087	7.5615		55.3365	14.3876	-0.226706	-561.597	0.791396	-0.441476	0.224005	75.5003	35.3746	45.2904				0.0144928						0.0144928		0.782609
Percentile 16%		2	9.88		54.76	14.95	0.13656	302.244	0.8104	0.0372	0.4476	72.48	30	43.16				Without сonduction blocks						Non-Hodgkin's lymphoma
M+2sd		17.4978	43.4422		99.153	360.421	5.15843	6192.94	5.36558	2.4715	2.16151	111.396	120.901	79.8566				56						1
Percentile 97,5%		16	47.8		90	431.228	5.291	9154.9	6.358	3.83975	2.552	98	98.1	71.7				0.811594						0.0144928
M-2sd		-5.49783	-4.39874		40.7311	-100.957	-2.02175	-2813.11	-0.733331	-1.41247	-0.421832	63.5352	6.86583	33.7684										Acute lymphoblastic leukemia
Percentile 2,5%		0	3.7		37.4	2.13125	0.06	90.9375	0.572	0.01	0.1755	56.975	7.375	32.6										1
Number of intervals k		6.35444	7.10498		7.10498	6.80398	6.87923	6.97381	6.61145	7.08393	6.97381	6.85458	6.90346	6.99652										0.0144928
																								Cervical cancer
																								1
																								0.0144928
																								Acute myeloid leukemia
																								1
																								0.0144928
																								Without oncological diseases
																								59
																								0.855072
Patients with myocarditis
1	F	4	20	0	62	50	0.072		4.9	0.39	0.56	88	90		3	0	0	Left bundle branch block	0	0	0	1	0	0	0	Chronic obstructive pulmonary disease
2	M	4	22	1	71	155	0.45	3175	1.475	1.5	0.6	91	85	47	2	0	0	0	Atrial extrasystole	0	1	1	0	0	0	0
3	M	4	23	1	61	250	0.94	2000	1.16	0.74	0.7	92	80		3	2	1	0	Ventricular extrasystole	0	1	1	0	0	0	0
4	F			1	82	94	3.96	378	0.7	2.97	0.8	96	10	30	3	2	0	0	0	0	1	0	0	0	1	0
5	M	3	30	1	59	390	0.05	420	1.55	0.02	0.03	88	85		3	0	0	0	0	0	0	0	0	0	0	Pulmonary Sarcoidosis
6	M	10	20	1	62	81.4	0.42	2000	1.47	1.21	1.58	85	70		3	2	0	Right bundle branch block	0	0	1	0	0	0	0	0
7	F			1	68	161	0.35		1.3	0.12	0.57	90	64		3	3	1	Right bundle branch block	0	0	1	0	0	0	1	0
8	F	12	27	1	59	41	4.51	492	3.06	0.1	0.43	80	90	70	2	0	0	0	0	0	0	1	0	0	0	0
Descriptive statistics															n, %	n, %	n, %	n, %	n, %	n, %	n, %	n, %	n, %	n, %	n, %	n, %
Volume samples, n		6	6	8	8	8	8	6	8	8	8	8	8	3	Stage III	Stage III	Present	Right bundle branch block	Atrial extrasystole	Present	Present	Present	Present	Without oncological diseases	Present	Chronic obstructive pulmonary disease
Minimum		3	20		59	41	0.05	378	0.7	0.02	0.03	80	10	30	6	1	2	2	1	0	5	4	0	8	2	1
Maximum		12	30		82	390	4.51	3175	4.9	2.97	1.58	96	90	70	0.75	0.125	0.25	0.25	0.125	0	0.625	0.5	0	1	0.25	0.125
Arithmetic mean M		6.16667	23.6667	0.875	65.5	152.8	1.344	1410.83	1.95188	0.88125	0.65875	88.75	71.75	49	Stage II	Stage II	Absent	Left bundle branch block	Ventricular extrasystole	Absent	Absent	Absent	Absent		Absent	Pulmonary Sarcoidosis
Standard deviation sd		3.81663	4.0332		7.91021	117.963	1.81122	1157.52	1.37112	1.00333	0.437377	4.80327	26.623	20.0749	2	3	6	1	1	8	3	4	8		6	1
Confidence interval 95% CI		4.00531	4.23258		6.6131	98.6192	1.51422	1214.74	1.14628	0.838804	0.365656	4.01564	22.2574	49.8687	0.25	0.375	0.75	0.125	0.125	1	0.375	0.5	1		0.75	0.125
Sample median Me		4	22.5		62	124.5	0.435	1246	1.4725	0.565	0.585	89	82.5	47	Stage I	Stage I		Without сonduction blocks	Without extrasystole							Without others diseases
Percentile 25%		4	20.5		60.5	73.55	0.2805	438	1.265	0.115	0.5275	87.25	68.5	38.5	0	0		5	6							6
Percentile 75%		8.5	26		68.75	183.25	1.695	2000	1.9275	1.2825	0.725	91.25	86.25	58.5	0	0		0.625	0.75							0.75
95% lower confidence limit Me		4	20		61	250	0.94	420	4.9	0.39	1.58	85	70	30	Without hypertension	Without heart failure
95% upper confidence limit Me		10	23		68	161	0.35	3175	1.3	0.12	0.56	91	85	70	0	4
Coefficient of variation CV=sd/M [0,1]		0.618913	0.170417		0.120767	0.772007	1.34764	0.820452	0.702461	1.13853	0.663949	0.0541214	0.371053	0.409691	0	0.5
Root mean square error m [0.5]		1.55813	1.64655		2.79668	41.7061	0.640364	472.556	0.484762	0.35473	0.154636	1.69821	9.41266	11.5902
Asymmetry As [±0.2]		1.03905	0.857637		1.51934	1.30123	1.374	0.589853	1.77079	1.45347	1.18917	-0.506621	-2.20614	0.443872
Extsess Ex [±1]		-1.16799	-0.689835		2.04916	1.40487	0.0411538	-1.28161	2.88125	2.03917	3.34361	0.872992	5.22184	2.65549
M+sd		9.9833	27.6999		73.4102	270.763	3.15522	2568.35	3.32299	1.88458	1.09613	93.5533	98.373	69.0749
Percentile 84%		10.4	27.6		70.64	239.32	3.5976	2235	2.8788	1.4652	0.788	91.88	89.4	62.64
M-sd		2.35004	19.6335		57.5898	34.8374	-0.467223	253.313	0.58076	-0.122079	0.221373	83.9467	45.127	28.9251
Percentile 16%		3.8	20		59.24	53.768	0.10536	411.6	1.1768	0.1024	0.4456	85.36	64.72	35.44
M+2sd		13.7999	31.7331		81.3204	388.725	4.96645	3725.87	4.69411	2.88791	1.5335	98.3565	124.996	89.1497
Percentile 97,5%		11.75	29.625		80.075	365.5	4.41375	3028.12	4.578	2.71275	1.4435	95.3	90	68.85
M-2sd		-1.46659	15.6003		49.6796	-83.1252	-2.27845	-904.208	-0.790355	-1.12541	-0.216003	79.1435	18.5039	8.85028
Percentile 2,5%		3.125	20		59	42.575	0.05385	383.25	0.7805	0.034	0.1	80.875	19.45	30.85
Number of intervals k		3.58346	3.58346		3.99826	3.99826	3.99826	3.58346	3.99826	3.99826	3.99826	3.99826	3.99826	2.58404
General statistics of all patients															n, %	n, %	n, %	n, %	n, %	n, %	n, %	n, %	n, %	n, %	n, %	n, %
Volume samples, n		47	75	77	77	64	67	69	57	76	71	66	68	67	Stage III	Stage III	Present	Right bundle branch block	Atrial extrasystole	Present	Present	Present	Present	Multiple myeloma	Present	Acute myocardial infarction
Minimum		0	3		34	0.84	0.05	74	0.42	0	0.03	48	0	24	51	13	30	5	1	2	42	15	2	1	23	8
Maximum		32	61		94	453.07	53	13695	20	5.04	3.8	98	100	76	0.662338	0.168831	0.38961	0.0649351	0.012987	0.025974	0.545455	0.194805	0.025974	0.012987	0.298701	0.103896
Arithmetic mean M		6.02128	19.8533	0.45	69.4805	132.615	3.48621	1665.65	2.875	0.566539	0.846056	87.6212	64.8088	56.4627	Stage II	Stage II	Absent	Sick sinus syndrome	Ventricular extrasystole	Absent	Absent	Absent	Absent	Liver cancer	Absent	Chronic obstructive pulmonary disease
Standard deviation sd		5.50687	11.5685		14.0886	114.979	7.7141	2174.12	3.54207	0.973662	0.626964	11.3229	28.2184	11.899	10	21	47	2	7	75	35	62	75	1	54	3
Confidence interval 95% CI		1.61688	2.66166		3.19773	28.7209	1.88162	522.281	0.939838	0.222491	0.1484	2.78352	6.8303	2.90239	0.12987	0.272727	0.61039	0.025974	0.0909091	0.974026	0.454545	0.805195	0.974026	0.012987	0.701299	0.038961
Sample median Me		4	18		71	112.91	0.471	1159	1.88	0.2	0.63	91.5	75.5	60	Stage I	Stage I		Sinoatrial block	Without extrasystole					Breast cancer		Cirrhosis of the liver
Percentile 25%		3	12.5		60	48.95	0.1905	492	1.12	0.06	0.495	86	40	49	0	1		1	69					4		2
Percentile 75%		8	24.5		81	172.29	3.965	2000	3.06	0.525	1.015	95.75	85	65	0	0.012987		0.012987	0.896104					0.0519481		0.025974
95% lower confidence limit Me		3	14		66	67.53	0.42	736.1	1.32	0.12	0.55	88	60	55	Without hypertension	Without heart failure		Left bundle branch block						Chronic lymphocytic leukemia		End-stage renal disease
95% upper confidence limit Me		6	20		76	148.61	1.84	1880	2.43	0.25	0.78	94	80	64	16	42		4						1		2
Coefficient of variation CV=sd/M [0,1]		0.914569	0.582697		0.202771	0.86701	2.21275	1.30527	1.23203	1.71861	0.741043	0.129226	0.435409	0.210741	0.207792	0.545455		0.0519481						0.012987		0.025974
Root mean square error m [0.5]		0.80326	1.33581		1.60555	14.3724	0.942427	261.734	0.469159	0.111687	0.074407	1.39375	3.42198	1.45369				AV block type 2						Hodgkin's lymphoma		Pulmonary Sarcoidosis
Asymmetry As [±0.2]		2.54463	1.26059		-0.575846	1.1793	4.6326	3.87138	3.51385	2.9307	2.32288	-1.67634	-0.854197	-0.81656				3						1		1
Extsess Ex [±1]		9.85891	2.39566		-0.337383	1.04865	26.3392	17.3467	13.4431	9.06108	7.48758	2.41319	-0.600609	-0.00327576				0.038961						0.012987		0.012987
M+sd		11.5281	31.4218		83.5692	247.594	11.2003	3839.77	6.41707	1.5402	1.47302	98.9441	93.0272	68.3617				AV block type 3						Stomach cancer		HIV infection
Percentile 84%		10.64	30.16		83	221.409	5.324	2000	3.94	1	1.332	97	90	67				1						1		1
M-sd		0.514406	8.28486		55.3919	17.6366	-4.22789	-508.475	-0.667072	-0.407123	0.219092	76.2983	36.5905	44.5637				0.012987						0.012987		0.0144928
Percentile 16%		2	10		56	16.466	0.136	325.132	0.8188	0.04	0.434	77.6	30	42.12				Without сonduction blocks						Non-Hodgkin's lymphoma		Without others diseases
M+2sd		17.035	42.9903		97.6578	362.573	18.9144	6013.89	9.95914	2.51386	2.09998	110.267	121.246	80.2606				61						1		60
Percentile 97,5%		15.85	45.4		90	422.959	21.856	8836.6	15	3.67375	2.4	98	97.3	71.4				0.792208						0.012987		0.779221
M-2sd		-4.99246	-3.28361		41.3032	-97.3423	-11.942	-2682.6	-4.20914	-1.38079	-0.407872	64.9754	8.37209	32.6647										Acute lymphoblastic leukemia
Percentile 2,5%		0	3.85		37.8	2.79325	0.0572	91.635	0.574	0.01	0.1575	58.375	8.375	29.3										1
Number of intervals k		6.55136	7.2252		7.26315	6.99652	7.06257	7.10498	6.8295	7.2443	7.14618	7.04089	7.08393	7.06257										0.012987
																								Cervical cancer
																								1
																								0.012987
																								Acute myeloid leukemia
																								1
																								0.012987
																								Without oncological diseases
																								67
																								0.87013
Analysis of variance between a group of patients with and without myocarditis																Cross-tabulation and Pearson Chi-square for assessing extrasystoles in patients with and without myocarditis					Cross-tabulation and Pearson Chi-square for assessing atrial fibrillation in patients with and without myocarditis					Cross-tabulation and Pearson Chi-square for assessing conduction blocks in patients with and without myocarditis
F critical		4.05661	3.97204		3.96847	3.99589	3.98856	3.98405	4.0162	3.97023	3.97981	3.99092	3.98627	3.98856		Myocarditis	6 (absent exstra.)	2 (present exstra.)	8 (total)		Myocarditis	6 (absent)	2 (present)	8 (total)				Conduction blocks						Total
F actual		0.00469056	0.705815		0.709925	0.278536	0.19675	0.0890592	0.627884	0.933284	0.802416	0.0892044	0.544866	1.23983		Without myocarditis	62 (absent exstra.)	7 (present exstra.)	69 (total)		Without myocarditis	41 (absent)	28 (present)	69 (total)				Absent	AV block	LBBB	RBBB	Sick sinus	SA-blok
R2		0.000104224	0.00957611		0.0093769	0.00447242	0.00301779	0.00132748	0.0112872	0.0124549	0.0114955	0.00139188	0.00818795	0.0187173		Pearson Chi-Square	1.533	Asymptotic Significance (2-sided)	0.216		Pearson Chi-Square	0.732	Asymptotic Significance (2-sided)	0.392		Myocarditis	Myocard	5	0	1	2	0	0	8
																											Without	56	4	3	3	2	1	69
Data for charts																										Total		61	4	4	5	2	1	77
		CRP, g/l		Ferritin, mg/l		Procalcitonin, ng/ml		D-dimer, mcg/ml		Troponin I, ng/ml		Lymphocytes, x10^9/l		%spO2		%CT		Ejection fraction %										Chi-Square Tests
		Without myocarditis	With myocarditis	Without myocarditis	With myocarditis	Without myocarditis	With myocarditis	Without myocarditis	With myocarditis	Without myocarditis	With myocarditis	Without myocarditis	With myocarditis	Without myocarditis	With myocarditis	Without myocarditis	With myocarditis	Without myocarditis	With myocarditis										Value	df	Asymptotic Significance (2-sided)
Sample median Me		0.11	0.12	1.159	1.25	0.486	0.435	2.09	2.09	0.2	0.585	0.63	0.585	92	89	75	82.5	60	47									Pearson Chi-Square	6,752a	5	0.239709
Percentile 25%		0.04	0.07	0.51	0.44	0.1905	0.2805	1.11	1.11	0.0575	0.5275	0.495	0.5275	86	87.25	38.75	68.5	50.75	38.5									Likelihood Ratio	5.54663	5	0.35286
Maximum		0.45	0.39	3.67	3.18	5.3	4.51	6.7	4.9	5.04	1.58	3.8	1.58	98	96	100	90	76	70									N of Valid Cases	77
Minimum		0.08	0.04	0.07	0.38	0.05	0.05	0.42	0.7	0	0.03	0.12	0.03	48	80	0	10	24	30
Percentile 75%		0.17	0.18	2	2	2.35	1.695	3.01	3.07	0.51	0.725	1.075	0.725	96	91.25	85	86.25	65	58.5

## Sheet: morphology 1 wave
Morphological changes in the myocardium
№	Large polymorphic cells	infarction/necrosis	hemorrhagic infarction	thrombi in the arteries	myocarditis	postinfarction cardiosclerosis	thrombi in the endocardium	pericarditis	amyloidosis/glycogenosis	fragmentation of muscle fibers	pustular myocarditis	vasculitis	macrophages	hemorrhage	edema with fibrin	myocardial hypertrophy	cancer metastasis	lipomatosis	microbial emboli	focal plasma impregnation	postmyocardial cardiosclerosis
1	0	0	0	0	0	0	0	0	0	0	0	0	0	0	0	0	0	0	0	0	0
2	0	0	0	0	0	0	0	0	0	0	0	0	0	0	0	0	0	0	0	0	0
3	0	0	0	0	0	0	0	0	0	0	0	0	0	3	0	0	0	0	0	0	0
4	1	0	0	0	0	0	0	0	0	0	0	0	0	0	0	0	0	0	0	0	0
5	0	0	0	0	0	0	0	0	0	0	0	0	in vessels	0	0	0	0	0	0	0	0
6	0	0	0	0	0	0	0	0	0	0	0	0	0	0	0	0	0	3	0	0	0
7	0	0	0	0	0	0	0	0	0	4	0	0	0	3	0	0	0	0	0	0	0
8	0	2	0	0	0	0	0	0	0	0	1	0	2	4	0	0	0	0	0	0	0
9	1	0	0	0	0	0	0	0	0	0	0	0	0	0	0	0	0	0	0	0	0
10	1	0	0	0	lymphocytic	0	0	0	0	0	0	0	0	3	0	0	0	0	0	0	0
11	1	0	5-6 days and 2-3 weeks	0	0	0	0	0	0	0	0	0	0	0	0	0	0	0	0	0	0
12	0	0	0	0	0	0	0	0	0	0	0	exudative	0	0	0	4	0	0	0	0	0
13	0	0	0	0	0	0	0	0	0	0	0	0	0	0	0	4	0	0	0	0	0
14	1	2	0	3	polymorphocellular	0	0	0	0	0	0	productive	2	4	0	0	0	0	0	0	0
15	0	2	0	3	lymphocytic-macrophage	3	0	lymphocytic	0	0	0	0	2	3	0	4	0	0	0	0	0
16	1	0	0	0	0	0	0	0	0	0	0	0	0	0	0	0	0	0	0	0	0
17	0	0	0	0	0	0	0	0	0	0	0	0	0	0	0	4	0	0	0	4	0
18	1	2	0	0	lymphocytic	0	0	0	0	0	0	0	4	4	0	4	0	0	0	0	0
19	1	0	0	0	0	0	0	0	0	0	0	0	0	0	0	0	0	0	0	0	0
20	1	0	0	0	0	4	0	0	0	4	0	0	0	4	0	4	0	0	0	3	0
21	1	0	0	0	0	4	0	0	0	0	0	0	0	0	0	4	0	0	0	0	0
22	1	0	0	0	0	4	0	0	0	0	0	0	0	0	0	4	0	0	0	0	0
23	1	0	0	0	0	4	0	0	0	0	0	0	0	0	0	4	0	0	0	0	0
24	1	2	0	3	lymphocytic	0	0	0	0	4	0	productive	19	4	0	3	0	0	0	4	0
25	1	0	0	0	0	0	0	0	0	0	0	0	0	4	4	0	0	0	0	0	0
26	1	0	0	0	0	0	0	0	0	0	0	0	0	0	0	0	0	0	0	0	0
27	0	3	0	0	0	3	0	0	0	0	0	productive	0	4	0	0	0	0	0	0	0
28	1	0	0	0	0	0	0	0	0	0	0	0	0	0	0	0	0	0	0	0	0
29	0	0	0	0	0	0	0	0	0	4	0	0	0	0	0	3	0	0	0	0	0
30	0	0	0	0	0	4	0	0	0	4	0	0	0	0	0	4	0	0	0	0	0
31	1	0	0	0	lymphocytic	0	0	0	0	0	0	0	0	0	0	0	0	0	0	0	0
32	0	0	0	0	0	4	0	0	0	4	0	0	0	0	0	4	0	0	0	0	0
33	1	2	0	3	lymphocytic	4	0	0	0	4	0	productive	5	4	0	4	0	0	0	4	0
34	1	0	0	0	0	0	0	0	0	4	0	0	0	4	0	4	0	0	0	0	0
35	0	0	0	0	0	4	0	0	0	4	0	0	in vessels	4	0	4	0	0	0	0	0
36	1	0	0	0	0	0	0	0	0	0	0	0	0	0	0	0	0	0	0	0	0
37	1	0	0	0	0	0	0	0	0	0	0	0	0	0	0	0	0	0	0	0	0
38	1	0	3 weeks	3	0	4	0	0	0	0	0	0	0	0	0	4	0	0	0	0	0
39	1	2	0	0	giant cell	0	0	0	0	4	0	productive	32	4	0	4	0	0	0	0	0
40	1	0	0	0	0	0	0	0	0	0	0	0	0	0	0	0	0	0	0	0	0
41	1	0	0	0	0	0	0	0	0	0	0	0	0	3	0	0	0	0	0	4	0
42	0	0	0	0	0	4	0	0	0	0	0	0	0	4	0	0	0	0	0	0	0
43	0	0	0	0	0	0	0	0	0	0	0	productive	0	3	0	0	0	0	0	0	0
44	1	2	0	3	polymorphocellular	0	0	0	0	3	1	0	45	4	0	3	0	0	0	0	0
45	0	0	0	0	0	0	0	0	0	0	0	0	0	0	0	0	0	0	0	0	0
46	1	0	3	0	0	2	0	0	0	0	0	0	0	4	0	4	0	0	0	0	0
47	1	2	0	0	lymphocytic	2	0	0	0	4	0	0	10	4	0	3	0	0	0	0	0
48	0	0	0	0	0	0	0	0	0	4	0	0	0	4	0	3	0	0	0	0	0
49	1	0	0	0	0	0	0	0	0	4	0	0	0	4	0	0	0	0	0	0	0
50	0	0	0	4	0	0	0	0	0	3	0	0	0	4	4	4	0	0	0	0	0
51	1	0	0	0	0	0	0	0	0	0	0	0	0	0	0	4	0	0	0	3	0
52	0	0	0	0	0	0	0	0	0	0	0	0	0	0	0	0	0	0	0	0	0
53	0	0	0	0	0	0	0	0	0	0	0	0	0	0	0	0	0	0	0	0	0
54	1	0	0	0	0	0	0	0	0	0	0	0	0	0	0	0	0	0	0	0	0
55	0	0	4	0	0	0	0	0	0	0	0	0	0	0	0	0	0	0	0	0	0
56	0	0	0	0	0	0	0	0	0	0	0	0	in vessels	0	0	0	0	0	0	0	0
57	1	0	0	0	0	0	0	0	0	0	0	0	0	0	0	0	0	0	0	0	0
58	1	0	0	0	lymphocytic	0	0	0	0	0	0	0	0	3	0	0	0	0	0	0	0
59	0	0	3	3	0	3	0	0	0	0	0	0	in vessels	0	0	0	0	0	0	0	0
60	0	0	0	0	0	0	0	0	0	0	0	0	0	3	0	0	0	0	0	0	0
61	0	0	0	0	0	0	0	0	0	0	0	0	0	3	0	4	0	0	0	0	0
62	1	0	0	0	0	0	0	0	0	0	0	0	0	3	0	0	0	0	0	0	0
63	0	0	0	0	0	0	0	0	0	0	0	0	0	3	0	0	0	0	0	0	0
64	1	2	0	0	lymphocytic-macrophage	0	0	0	0	4	0	0	10	4	0	3	0	0	0	4	0
65	1	0	0	0	0	0	0	0	0	0	0	0	0	0	0	0	0	0	0	0	0
66	1	0	0	0	0	0	0	0	0	0	0	0	in vessels	4	0	2	0	0	0	4	0
67	1	2	0	4	leukocytic	0	0	0	0	3	1	0	5	4	4	3	0	0	0	0	0
68	0	2	0	0	lymphocytic	0	0	0	0	3	0	0	5	4	4	3	0	0	0	0	0
69	0	0	0	0	0	0	0	0	0	0	0	0	0	4	0	2	0	3	0	0	0
70	1	0	0	0	0	0	0	0	0	0	0	0	0	0	0	2	0	0	0	0	0
71	0	0	0	0	0	0	0	0	0	0	0	0	0	0	0	0	0	0	0	0	0
72	1	0	0	0	0	0	0	0	0	4	0	0	0	4	0	4	0	0	0	0	0
73	1	0	0	0	0	0	0	0	0	4	0	0	0	4	0	4	0	0	0	4	0
74	0	0	0	0	0	0	0	0	0	4	0	0	in vessels	0	0	4	0	0	0	0	0
75	0	0	0	0	0	0	0	0	0	0	0	0	0	0	0	0	0	0	0	0	0
76	1	2	0	0	lymphocytic	0	0	0	0	4	0	0	7	4	4	3	0	0	0	4	0
77	1	0	0	0	0	0	0	0	0	0	0	0	0	0	4	2	0	0	0	0	0
% trait in group	0.558442	0.181818	0.0649351	0.116883	0.194805	0.194805	0	0.012987	0	0.285714	0.038961	0.0909091	0.246753	0.480519	0.0779221	0.467532	0	0.025974	0	0.12987	0

## Sheet: wave 2, clinic
	Sex	Duration for onset of symptoms	Death per sick day	Invasive ventilation	Age, years	CRP, mg/l	Procalcitonin, ng/ml	Ferritin, mcg/l	D-dimer, mcg/ml	Troponin I, ng/ml	Lymphocytes, x10^9/l	%spO2	%CT	Ejection fraction %	Hypertensive heart disease	Chronic heart failure	Atrial fibrillation	Conduction blocks	Extrasystoles	Acute kidney injury	Cardiac ischemia	Diabetes	Cerebrovascular accident	Oncological diseases	Cerebrovascular disease	Others
Patients without myocarditis
1	F	5	29	1	65	213.64	2.29	1284.5	0.55	0.705	0.74		70		3	1	1	0	0	0	1	1	0	0	0	0
2	M	2	32	0	75	6.2	0.276	1609.1	0.43	0.1	1.49	100	0	60	3	2	1	0	0	0	1	1	0	0	1	Chronic obstructive pulmonary disease
3	F	24	31	1	83	35.96	1	1295	1.46	0	1.24		64	65	2	0	0	0	0	0	0	0	0	Stomach cancer	0	0
4	M	2	25	1	79	104.1	0.135	379.9	0.69	0.1	1.91	77	45	20	3	2	1	AV block type 2	0	0	1	0	0	Chronic lymphocytic leukemia	0	Chronic obstructive pulmonary disease
5	F	2	15	1	60	94.39	0	1548	0.57	0.1	0.43	80	44	43	3	0	1	0	0	0	0	1	0	0	0	0
6	F	18	27	1	82	163.62	0.116	2475.9	0.98	0.1	0.67	90	70	61	3	2	0	0	0	0	1	0	0	Non-Hodgkin's lymphoma	1	0
7	M	5	26	0	71	91.98	0	1985	0.54	0	0.53		40	64	3	0	1	AV block type 3	0	0	0	0	0	0	0	0
8	M	6	10	1	62	59.37	0.601	902.5	0.59	0.1	0.58	70	55		3	0	0	Sick sinus syndrome	0	0	0	1	0	0	0	Cirrhosis of the liver
9	F	5	31	1	88	348.42	0.183	1423.5	0.74	0.1	0.72	84	80	60	3	0	0	0	0	0	1	0	0	0	1	0
10	M	5	13	1	60	286.08	0.729	2555.3	2	3.2	1.03	77	68	55	3	0	0	AV block type 2	0	0	1	1	0	0	0	Acute myocardial infarction
11	F	8	26	0	69	218.05	0.159	168	0.79	0.1	0.33	89	76	65	3	0	0	Left bundle branch block	0	0	1	0	0	0	1	0
12	F			0	98	97.93	0.315	739.1	0.66	3.39	0.8	65	80	40	3	0	0	0	0	0	1	1	0	0	1	Acute myocardial infarction
13	F	2	20	1	61	139.47	0	1302	0.99	0	0.55	60	90	60	0	0	0	0	0	0	0	1	0	0	0	0
14	M	7	25	1	69	16.61	0.1	193.1	0.78	0.1	0.97	97	15	56	3	2	1	AV block type 2	0	0	1	0	0	0	0	0
15	F	9	40	1	81	180.52	0.287	1997.2	0.81	0.1	0.82	93	60	56	3	1	1	0	0	0	1	1	0	0	1	Chronic obstructive pulmonary disease
16	F	7	19	1	73	86.97	1.13	74.2	1.08	0.445	1.74	94	25	35	3	1	1	0	0	0	1	1	0	0	0	0
17	M	6	13	1	72	284.52	1.85	967.6	1.05	0.1	0.74	85	45	60	3	0	0	0	0	0	1	1	0	0	1	0
18	M	4	5	1	59	70.06	2.6	2580.5	0.47	3.29	1.53	98	5		3	2	0	0	0	0	1	0	0	0	0	Acute myocardial infarction
19	F	7	26	1	90	8.2	0.049	251.9	0.74	0.1	1.09	94	25	50	3	2	0	Right bundle branch block	0	0	1	0	0	0	1	0
20	F	9	25	1	72	99.14	0	737	0.6	0.1	1.4	85	40	63	3	0	0	0	0	0	0	1	0	0	1	0
21	F	5	22	1	73	44.7	0.062	321.4	0.54	0.1	0.69	83	30	60	3	0	1	AV block type 3	0	0	1	1	0	0	1	Rheumatoid arthritis
22	M	2	19	0	69	46.6	2	440	1.24	0	1.42	87	40	59	3	0	1	0	0	0	1	0	0	0	1	0
23	F	3	7	0	93	106.33	0.417	653.2	0.48	0.1	2.86	70	56	34	3	2	1	Sick sinus syndrome	0	0	1	1	0	0	1	0
24	M	12	38	1	66	146.42	0.206	651.1	0.93	0.1	0.97	85	75		3	0	1	0	0	0	1	1	0	0	1	0
25	F	5	14	0	83	38.06	0.081	2086.6	0.29	0.1	0.69	92	10	52	3	0	1	0	0	0	1	0	0	0	1	0
26	M	9	19	0	80	155.66	1.36	916.9	0.67	0.1	0.68	87	45		3	0	1	0	0	0	1	1	0	Prostate cancer	1	0
27	M	13	38	1	93	115.6	0.105	456.1	0.38	0.1	0.9	94	68		3	0	1	Right bundle branch block	0	0	1	0	0	0	1	0
28	M	4	17	1	83	122.93	0.256	612.4	0.7	0.13	0.67	83	45	62	3	0	0	0	0	0	1	1	0	0	1	0
29	M	2	30	1	86	43.28	0.072	406.5	1.33	0.1	1.16	94	10		3	2	1	Left bundle branch block	0	0	1	1	0	0	1	Acute myocardial infarction
30	F	15	31	1	83	108.39	0.158	265.5	0.83	0.1	0.3	94	50		3	0	1	0	0	0	1	1	0	0	1	0
31	M	8	25	1	60	152.34	0	1578	0.5	0	2.38	68	70	59	3	0	0	0	0	0	1	0	0	0	0	Chronic obstructive pulmonary disease
32	F	8	20	1	73	86.62	1	1185	0.44	0	1.3	90	68	65	3	0	0	0	0	0	1	1	0	0	0	0
33	F	11	27	0	52	107.25	0	355	0.4	0	1.82	92	44		3	0	0	0	0	0	0	0	0	0	0	0
34	M	11	24	0	70	125.82	1	421	0.66	0	0.33	89	70	69	3	2	1	0	0	0	1	0	0	0	1	0
35	M	6	15	1	74	313.78	0.643	1980.8	1.33	0.184	0.79	70	85	45	3	0	0	0	Ventricular extrasystole	0	1	1	0	0	0	End-stage renal disease
36	F	6	54	1	55	276.38	2.93	734.5	1.5	0.18	0.53	90	80	62	3	0	0	0	0	0	1	1	0	0	1	0
37	F	7	12	0	89	88.39	0.153	987	0.25	0.105	0.98	98	10	25	3	3	1	0	0	0	1	1	0	0	1	Dilated cardiomyopathy
38	M	9	16	1	86	57.14					0.93	89	0		0	0	0	0	0	0	0	0	0	0	0	Chronic obstructive pulmonary disease
39	F	8	15	0	73	211.64	0.086	499.9	0.23	0.1	0.98	73	55		3	2	0	0	0	0	1	0	0	0	0	0
40	F	8	13	1	40	96.01	3.12	10.9	1.16	0.402	2.31	92	0	57	0	0	0	0	0	0	0	0	0	0	0	0
41	M	3	30	1	81	222.81	0.558	1168.5	0.85	0.416	0.34	95	60	41	0	0	0	0	0	0	1	0	0	0	0	Acute myocardial infarction
42	M	6	8	0	95	143.77	0.429	703	1.44	0.381	1.37	80	78		3	3	0	Right bundle branch block	0	0	1	0	0	0	1	0
43	F	7	42	1	67	38.4	0	113	0.47	0	1.83	92	40	30	0	0	1	0	Atrial extrasystole	0	1	1	0	0	1	0
44	F	16	45	1	45	30.01	0	45	0.76	0	0.8	85	80	65	2	0	0	Left bundle branch block	0	0	0	0	0	0	0	HIV/AIDS
45	F	3	9	0	82	215.82	2.8	2153.4	1.01	0.149	0.92	82	40		0	0	1	Right bundle branch block	0	0	0	0	0	Bladder cancer	0	0
46	M	9	19	1	62	51.64	0	690	0.52	0	1.04	96	20	62	2	0	0	0	0	0	0	0	0	0	0	Chronic obstructive pulmonary disease
47	M	8	15	1	84	244	8.8	466	0.88	0.6	0.39	90	70		3	2	0	0	Atrial extrasystole	0	1	0	0	0	1	0
48	F	3	11	1	92	226.79	0.37	2018.6		0.132	1.25	82	90		0	0	0	0	0	0	0	0	0	Chronic myeloid leukemia	0	0
49	F	12	26	1	78	31.28	0.107	332.5	2.81	0.1	0.92	89	78		3	0	1	Right bundle branch block	0	0	1	1	0	0	1	Chronic obstructive pulmonary disease
50	M	6	23	1	66	37.03	0.289	1031.5	0.51	0.145	0.91	93	45	53	3	0	1	0	0	0	1	1	0	0	0	0
51	M	2	10	0	62	109.32	0.134	1038.4	0.7	0.1	1.88	82	70	60	2	0	1	AV block type 1	0	0	0	0	0	Chronic lymphocytic leukemia	0	0
52	F	8	15	1	85	120.19	0.492			0.1	1.22	91	76		3	0	0	0	0	0	1	1	0	0	1	Rheumatoid arthritis
53	F	4	12	0	67	163.81	2	1573	2.4	0	1.12	94	28		0	0	0	0	0	0	0	0	0	0	0	0
54	F	7	25	1	89	24.9	0.141	546	0.63	0.1	0.52	94	10	56	3	0	0	0	0	0	1	0	0	0	0	0
55	F	2	12	0	84	17.52	0.134	106.2	0.58	0.227	0.71	99	10	33	3	3	0	Sinoatrial block	Atrial extrasystole	0	1	1	0	0	1	Dilated cardiomyopathy
56	F	6	13	1	88	37.06	0	635	0.5	0	0.77	89	40	65	0	0	0	0	Atrial extrasystole	0	0	0	0	0	0	0
57	M	7	27	1	76	7.03	0	733	2.9	0	0.6	90	64	64	2	0	0	Left bundle branch block	0	0	0	0	0	0	0	0
58	M	26	36	0	58	64.28	0.095	681.8	0.33	0.305	1.18	94	20		2	0	0	Left bundle branch block	0	0	1	0	0	0	0	0
59	M	2	8	1	80	284.47	2.81	390.3	2.8	0.1	1.55	92	40	47	3	3	1	0	0	0	1	0	0	0	1	0
60	M	10	25	1	80	55.79	0.175	228.4	0.7	0.1	0.85	92	20		3	0	0	Left bundle branch block	0	0	1	0	0	0	1	0
61	M	4	16	1	71	0.2	1.51	743.7	0.44	0.1	2.96	78	24	30	3	2	1	0	0	0	1	0	0	0	1	0
62	M	3	8	1	74	132.58	0.182		0.49	0.462	0.53	91	70	58	3	2	1	0	0	0	1	1	1	0	1	0
63	F	4	19	1	75	13.05	0.237	192.4	0.63	0.411	2.57	92	32	30	3	2	1	0	0	0	0	1	0	Prostate cancer, Chronic myeloid leukemia	1	Dilated cardiomyopathy
64	F	11	32	1	73	10.01	0	267	0.42	0	0.66	94	36	62	3	0	1	0	0	0	1	0	0	0	0	0
65	F	21	35	0	85	62.33	0.058	288.2	0.43	0.1	1.8	92	45		3	2	0	Right bundle branch block	0	0	1	1	0	0	0	0
66	M	7	22	1	84	86.76	0.149	1760.3	0.57	0.1	0.31	89	64		3	0	1	Sick sinus syndrome	0	0	1	0	0	0	1	0
67	M	4	15	0	68	38.56	0.1	556.6	0.28	0.226	1.72	95	25	23	3	2	0	Right bundle branch block	0	0	0	0	0	0	0	Rheumatoid arthritis
68	M	6	7	0	81	24.31	0.063	895.4	0.96	0.1	0.5	90	40	57	3	3	0	Sick sinus syndrome	Ventricular extrasystole	0	1	0	0	0	1	0
69	M	10	24	1	82	64.31	0.069	332.1	0.29	0.1	1.57	97	30	57	3	3	1	Left bundle branch block	0	0	1	0	0	0	1	End-stage renal disease
70	M	7	17	1	71	164	0	827	1.14	0	0.91	89	52	64	3	0	0	Right bundle branch block	0	0	1	0	0	Melanoma	0	0
71	F	4	8	1	94	68.09	0.174	977	0.32	1.05	1.4	89	35	20	3	2	0	Left bundle branch block	0	0	1	0	0	0	1	0
72	F	9	23	1	61	39.57	0.22	453.2	0.18	0.1	0.76	98	38		3	0	0	0	0	0	0	0	0	0	0	0
73	F	5	17	1	88	18.94	0.18	520.4	0.17	0.1	1.69	94	10	62	3	2	0	AV block type 1	0	0	1	0	0	0	0	0
74	M	7	40	1	59	88.2	0.11	516.2	0.3	0.1	1.24	97	10		3	2	0	0	0	0	1	1	0	0	1	0
75	M	1	14	0	88	23.4	0.066	1094.6	1.4	0.1	1.06	94	30	30	3	2	0	Right bundle branch block	0	0	1	0	0	0	1	Dilated cardiomyopathy
76	M	10	24	1	57	14	0	157	0.3	0	1.32	90	55	65	2	0	0	0	0	0	0	1	0	0	0	0
77	F	9	27	1	81	92.49	0	562	1.01	0	11.58	87	70	60	2	0	0	0	0	0	0	0	0	Chronic lymphocytic leukemia	0	0
78	M	6	12	1	80	59.3	0	270.59	1.12	0	1.31	95	40	53	0	3	1	Right bundle branch block	0	0	1	0	0	0	0	0
79	M	9	19	1	68	128.7	0	454	0.54	0	0.28	32	87	64	3	2	1	Right bundle branch block	0	0	1	1	0	0	0	0
80	F	8	26	1	82	35.31	0.091	1109.3	0.46	0.1	0.66	93	55		3	0	1	0	0	0	1	1	0	0	1	0
81	M	16	25	1	89	263.5	0	408	2.4	0	1.07	79	80	66	3	2	1	Right bundle branch block	0	0	0	0	0	0	0	Chronic obstructive pulmonary disease
82	M	1	7	1	66	73.67	0.17	139.9	0.32	0.1	0.79	82	28	60	3	0	1	Right bundle branch block	0	0	1	1	0	0	0	0
83	F	12	22	1	77	213.4	0	696	0.69	0	0.45	86	72	52	2	0	0	0	0	0	0	0	0	0	0	0
84	F	8	18	1	50	22.68	0.048	133.4	0.19	0.1	0.6	95	40		3	1	0	Right bundle branch block	0	0	0	0	0	Breast cancer, Diffuse large B cell lymphoma	0	0
85	F	8	22	1	71	44.83	0	161	2.29	0	1.24	94	60	61	0	0	0	Left bundle branch block	0	0	0	0	0	0	0	0
86	F	8	21	1	72	135.66	0.128	1125.2	0.47	0.143	1.56	96	75		3	0	0	0	0	0	1	0	0	0	0	0
87	M	17	26	1	60	32.79	0	274	1.57	0	0.84	93	75	65	3	0	0	Right bundle branch block	0	0	1	0	0	0	0	0
88	F	6	16	1	84	193.3	0.334	122.8	1.19	0.1	1.11	95	80		3	0	0	0	0	0	1	1	0	0	1	Cirrhosis of the liver
89	M	5	6	0	72	25	0	425	1.96	0	1.08	92	44	66	3	0	0	Right bundle branch block	0	0	1	0	0	0	0	0
90	F	5	13	1	80	37.01	0.235	531.8	0.82	1.86	1.98	99	25	48	3	3	0	0	0	0	1	1	0	0	1	Acute myocardial infarction
91	F	10	22	1	81	100.42	0.141	710.4	0.3	0.533	0.81	94	80	57	3	0	0	0	0	0	1	1	0	0	0	0
92	M	12	19	1	76	63.68	0	665	3.01	0	1.24	85	60		2	0	0	Left bundle branch block	0	1	0	0	0	0	1	Cirrhosis of the liver
93	M	5	12	0	64	26.36	0.063	47.2		0.1	0.65	91	20	20	3	2	1	AV block type 1	Ventricular extrasystole	0	1	1	0	0	0	0
94	M	6	22	1	60	80.3	0.108	315.6		0.1	0.79	92	35	50	3	3	1	0	0	0	1	1	0	0	0	Dilated cardiomyopathy
95	F	4	18	1	70	79.4	0.237	2.45	0.69	0.1	0.63	93	20	60	3	3	1	AV block type 3	0	0	1	0	0	0	0	Rheumatoid arthritis
96	M	7	14	1	66	373.21	0.754	620.6	0.7	0.1	0.36	90	80		3	0	1	0	0	0	1	1	0	0	0	0
97	M	3	7	1	56	66.89	0.126	294.9	0.29	1.94	1.2	92	5	40	3	2	0	0	0	0	1	1	0	0	0	Dilated cardiomyopathy
98	M	8	20	0	57	240.11	6.5	919.6	0.5	0.1	1.92	80	75	60	2	0	0	0	0	0	0	0	0	0	0	0
99	F	1	8	1	93	23.37	0.114	847.8	0.67	0.1	0.32	90	8	36	3	2	1	0	0	0	1	1	0	0	1	0
100	F	4	22	1	84	165.49	0.282	193.4	0.26	0.1	4.87	83	40		3	0	1	Right bundle branch block	0	0	1	1	0	Chronic myeloid leukemia	1	Chronic obstructive pulmonary disease
101	F	7	15	0	84	234.87	0.511	154.7	0.78	0.1	0.39	94	30	50	3	2	ФП	0	0	0	1	0	0	0	1	Rheumatoid arthritis
102	F	11	19	1	66	101.28	1.06	2472.1	1.06	0.1	0.09	90	75		3	0	1	AV block type 1	0	0	0	0	0	Acute myeloid leukemia	0	0
103	F	2	14	1	68	142.88	0	4352	0.56	0	0.28	92	72	63	3	0	0	0	0	0	1	1	0	Multiple myeloma	0	0
104	M	4	19	1	85	32.76	0.182	278.3	0.79	0	0.79	97	28		3	0	1	0	0	0	0	1	0	0	1	0
105	M	5	5	0	82	256	1	3070	2.5	0	0.77	85	80		0	0	1	0	0	0	1	1	0	0	0	0
106	F	3	8	1	59	295.54	4.9	1043.4	0.69	0	0.44	85	50	62	3	2	1	0	0	0	0	1	0	0	0	0
107	F	9	26	1	65	248.47	0.115	855.4	0.41	0.1	1.17	88	55		3	0	0	0	0	0	1	1	0	0	1	0
108	F	5	11	1	80	98.66	0	209	1.95	0	0.5	86	80	64	0	0	0	0	0	0	0	0	0	0	0	0
109	M	6	16	1	55	43.47	0.074	460.5	0.39	0.1	1.11	94	24	63	3	0	0	0	0	0	0	0	0	0	0	0
110	M	10	20	1	65	107.68	0.205	1148.8	0.8	0.368	0.34	89	65	18	3	0	0	AV block type 1	0	0	1	1	0	0	1	Chronic obstructive pulmonary disease
111	F	5	15	1	83	38.06	0.081	542.9	0.29	0.1	0.69	92	10	52	3	2	1	0	0	0	1	0	0	0	0	0
112	M	17	30	1	71	72.99	0.549	1767.9	1.24	0.2	0.77	95	48	50	3	3	1	0	0	0	1	1	0	0	1	0
113	F	4	24	0	83	24.29	0.118	176.2	0.49	0.1	1.9	98	12		3	2	0	Left bundle branch block	0	0	1	0	0	0	0	Rheumatoid arthritis
114	M	13	26	1	58	105.13	0.419	1170.7	0.54	0.1	1.13	75	70		3	0	1	0	0	0	1	1	0	0	0	0
115	M	1	8	0	82	87.38	1	737	1.3	0	0.88	92	36	48	3	2	0	0	Ventricular extrasystole	0	1	0	0	0	1	0
116	M	2	13	1	68	8.11	0.407	168.2	0.44	0.26	0.53	99	20		3	2	1	0	0	0	1	1	0	0	1	0
117	F	60	66	0	82	184.67	0.108	185.4	0.89	3.57	0.25	77	72	55	3	0	0	Left bundle branch block	0	0	1	0	0	0	0	Acute myocardial infarction
118	F	7	32	1	79	205.43	0.166	522.8	0.7	0.1	1.02	79	65		3	0	1	0	0	0	1	1	0	0	1	0
Descriptive statistics															n, %	n, %	n, %	n, %	n, %	n, %	n, %	n, %	n, %	n, %	n, %	n, %
Volume samples, n		117	117	118	118	118	117	115	113	117	116	115	118	79	Stage III	Stage III	Present	Right bundle branch block	Ventricular extrasystole	Present	Present	Present	Present	Multiple myeloma	Present	Acute myocardial infarction
Minimum		1	5		40	0.2	0	2.45	0.17	0	0.09	32	0	18	94	11	51	17	4	1	85	54	1	1	53	7
Maximum		60	66		98	373.21	8.8	4352	3.01	3.57	2.96	100	90	69	0.79661	0.0932203	0.432203	0.144068	0.0338983	0.00847458	0.720339	0.457627	0.00847458	0.00847458	0.449153	0.059322
Arithmetic mean M		7.64103	20.6581	0.75	74.0339	109.215	0.582453	814.009	0.856283	0.264179	1.00957	88.2	47.7034	52.3924	Stage II	Stage II	Absent	Sick sinus syndrome	Atrial extrasystole	Absent	Absent	Absent	Absent	Melanoma	Absent	Chronic obstructive pulmonary disease
Standard deviation sd		6.68047	10.2066		11.6816	86.1752	1.24022	731.482	0.62709	0.648782	0.56068	9.34448	24.7384	13.4997	11	31	66	4	4	117	33	64	117	1	65	10
Confidence interval 95% CI		1.22325	1.86892		2.12974	15.711	0.227096	135.126	0.116884	0.118798	0.103117	1.72619	4.51018	3.02376	0.0932203	0.262712	0.559322	0.0338983	0.0338983	0.991525	0.279661	0.542373	0.991525	0.00847458	0.550847	0.0847458
Sample median Me		7	19		74	88.295	0.149	620.6	0.69	0.1	0.905	90	45	57	Stage I	Stage I		Sinoatrial block	Without extrasystoles					Bladder cancer		Cirrhosis of the liver
Percentile 25%		4	13		66	38.145	0.063	291.55	0.47	0	0.645	85	28	47.5	0	4		1	110					1		3
Percentile 75%		9	26		83	154.83	0.429	1069	1.01	0.105	1.2425	94	70	62	0	0.0338983		0.00847458	0.932203					0.00847458		0.0254237
95% lower confidence limit Me		6	17		71	64.31	0.11	460.5	0.56	0.1	0.77	89	40	53	Without hypertension	Without heart failure		Left bundle branch block						Chronic lymphocytic leukemia		End-stage renal disease
95% upper confidence limit Me		7	22		80	105.13	0.183	734.5	0.76	0.1	1.04	92	56	60	13	72		12						4		2
Coefficient of variation CV=sd/M [0,1]		0.874289	0.494073		0.157788	0.789044	2.12931	0.898616	0.732339	2.45584	0.555366	0.105946	0.518588	0.257665	0.110169	0.610169		0.101695						0.0338983		0.0169492
Root mean square error m [0.5]		0.617609	0.943603		1.07538	7.93307	0.114658	68.211	0.0589916	0.0599799	0.0520579	0.871377	2.27735	1.51883				AV block type 1						Stomach cancer		Rheumatoid arthritis
Asymmetry As [±0.2]		4.61902	1.23229		-0.334251	0.987221	4.16821	1.85479	1.79374	4.11905	1.13323	-2.57792	-0.179259	-1.15599				5						1		6
Extsess Ex [±1]		32.4776	3.04554		-0.374836	0.22753	21.0826	4.66813	2.95454	16.8032	1.48105	11.1517	-1.12067	0.243791				0.0423729						0.00847458		0.0508475
M+sd		14.3215	30.8647		85.7155	195.39	1.82267	1545.49	1.48337	0.912962	1.57025	97.5445	72.4418	65.8921				AV block type 2						Non-Hodgkin's lymphoma		HIV/AIDS
Percentile 84%		11	29.44		85	213.467	1	1394.34	1.3024	0.24152	1.542	95	75	64				3						1		1
M-sd		0.960558	10.4515		62.3523	23.0395	-0.657768	82.5272	0.229194	-0.384603	0.448889	78.8555	22.965	38.8927				0.0254237						0.00847458		0.00847458
Percentile 16%		3	11.56		60.72	28.988	0	193.172	0.3892	0	0.508	82	20	35.48				AV block type 3						Prostate cancer		Dilated cardiomyopathy
M+2sd		21.002	41.0714		97.3971	281.565	3.06289	2276.97	2.11046	1.56174	2.13093	106.889	97.1802	79.3918				3						2		6
Percentile 97,5%		21.3	42.3		93.075	296.908	3.298	2559.08	2.802	3.209	2.40375	99	85.15	66				0.0254237						0.0169492		0.0508475
M-2sd		-5.71991	0.244868		50.6706	-63.1357	-1.89799	-648.955	-0.397896	-1.03339	-0.111792	69.511	-1.7734	25.393				Without сonduction blocks						Diffuse large B cell lymphoma		Without others diseases
Percentile 2,5%		1	6.9		51.85	8.029	0	46.87	0.222	0	0.28	67.55	4.625	20				73						1		83
Number of intervals k		7.86638	7.86638		7.87865	7.87865	7.86638	7.84152	7.81622	7.86638	7.854	7.84152	7.87865	7.30012				0.618644						0.00847458		0.70339
											Values highlighted in red were not taken into account in the overall statistics, as these patients have an anamnesis of leukemia													Acute myeloid leukemia
																								1
																								0.00847458
																								Chronic myeloid leukemia
																								3
																								0.0254237
																								Breast cancer
																								1
																								0.00847458
																								Without oncological diseases
																								104
																								0.881356
Patient with myocarditis
1	F	7	29	0	58	113.12	0	1124	1	0	0.48	80	75	65	2	0	0	0	0	0	0	0	0	0	0	0
Data for charts
		CRP, g/l	Ferritin, mg/l	Procalcitonin, ng/ml	D-dimer, mcg/ml	Troponin I, ng/ml	Lymphocytes, x10^9/l	%spO2	%CT	Ejection fraction %
Sample median Me		0.09	0.62	0.149	0.69	0.1	0.905	0.9	0.45	0.57
Percentile 25%		0.04	0.29	0.063	0.47	0	0.645	0.85	0.28	0.48
Maximum		0.37	4.35	8.8	3.01	3.57	2.96	1	0.9	0.69
Minimum		0	0	0	0.17	0	0.09	0.32	0	0.18
Percentile 75%		0.15	1.07	0.429	1.01	0.105	1.2425	0.94	0.7	0.62

## Sheet: morphology 2 wave
Morphological changes in the myocardium
№	Large polymorphic cells	infarction/necrosis	hemorrhagic infarction	thrombi in the arteries	myocarditis	postinfarction cardiosclerosis	thrombi in the endocardium	pericarditis	amyloidosis/glycogenosis	fragmentation of muscle fibers	pustular myocarditis	vasculitis	macrophages	hemorrhage	edema with fibrin	myocardial hypertrophy	cancer metastasis	lipomatosis	microbial emboli	focal plasma impregnation	postmyocardial cardiosclerosis
1	0	0	0	0	0	0	0	0	0	0	0	0	0	0	1	2	0	0	0	0	0
2	0	0	0	0	0	0	0	0	0	0	0	0	0	0	2	2	2	0	0	0	0
3	0	0	0	0	0	0	0	0	0	0	0	0	0	0	0	2	0	4	0	0	0
4	0	0	0	0	0	3	0	0	0	0	0	0	0	0	0	3	0	0	0	0	0
5	0	0	0	0	0	0	0	0	0	0	0	0	0	0	0	2	0	0	0	0	0
6	0	2-3 days	3	0	0	3	0	0	0	3	0	0	0	3	2	2	0	0	0	0	0
7	0	0	0	0	0	0	0	0	0	4	0	0	3	1	0	2	0	0	0	0	0
8	0	0	0	0	0	0	0	0	0	0	0	0	0	0	0	1	0	0	0	0	0
9	0	2-3 days	3	0	0	0	0	0	0	4	0	0	2	3	2	3	0	0	0	0	0
10	0	0	0	0	0	0	0	0	0	0	0	0	0	0	0	0	0	3	0	0	0
11	0	2-3 days	3	0	0	0	0	0	0	0	0	0	3	3	2	0	0	0	0	0	0
12	0	0	0	0	0	0	0	0	0	0	0	0	3	0	0	0	0	0	0	0	0
13	0	2 areactive necrosis	0	0	0	0	0	0	0	0	0	0	in vessels	0	0	2	0	0	0	0	0
14	0	0	0	0	0	0	0	0	0	0	0	0	0	0	2	3	0	0	0	0	0
15	0	0	0	0	0	3	0	0	0	3	2	0	0	2	3	2	0	0	0	0	0
16	0	0	0	0	0	0	0	0	0	0	0	0	0	0	0	4	0	0	0	3	4
17	0	0	0	0	0	0	0	0	0	0	0	0	2	3	2	0	0	0	0	0	0
18	0	0	0	0	0	0	0	0	0	0	0	0	2	0	0	0	0	3	0	0	0
19	0	0	0	0	0	0	0	0	0	0	0	0	0	3	2	0	0	0	0	0	0
20	0	0	0	0	0	2	0	0	0	0	0	0	0	0	0	0	0	3	0	0	0
21	0	0	0	0	0	4	0	0	0	0	0	0	0	0	0	4	0	0	0	0	0
22	0	0	0	0	0	0	0	0	0	4	0	0	0	0	0	0	0	0	0	3	0
23	0	0	0	0	0	0	0	0	0	0	0	0	0	0	0	0	0	0	0	0
24	0	0	0	0	0	0	0	0	0	4	0	0	0	3	3	2	0	0	0	0	0
25	0	0	0	0	0	3	0	0	0	0	0	0	0	0	3	0	0	0	0	0	0
26	0	0	0	0	0	0	0	0	0	0	0	0	0	0	0	0	0	0	0	0
27	0	0	0	0	0	0	0	0	0	0	0	0	0	0	3	3	0	0	0	0	0
28	0	0	0	0	0	0	0	0	0	0	0	0	0	0	0	3	0	0	0	0	0
29	0	0	0	0	0	3	0	0	0	0	0	0	0	0	3	3	0	3	0	0	0
30	0	0	0	0	0	0	0	0	0	0	0	0	0	0	0	2	0	0	0	0	0
31	0	0	0	0	0	0	0	0	0	0	0	0	0	0	0	0	0	0	0	0	0
32	0	0	0	0	0	2	0	0	0	0	0	0	2	0	0	4	0	0	0	0	0
33	0	0	0	0	0	0	0	0	0	4	0	0	3	0	0	4	0	0	0	0	0
34	0	0	0	0	0	0	0	0	0	0	0	0	0	0	0	0	0	0	0	0	0
35	0	6 days	3	0	0	2	0	0	0	0	0	0	0	0	0	3	0	0	0	0	0
36	0	0	0	0	0	0	0	0	0	4	0	0	3	0	2	2	0	0	0	0	0
37	0	0	0	0	0	3	0	0	0	0	0	0	0	0	0	3	0	0	0	0	0
38	0	2-3 weeks	0	0	0	4	0	0	0	0	0	0	0	0	0	4	0	0	0	0	0
39	0	0	0	0	0	3	0	0	0	4	0	0	0	0	4	4	0	0	0	0	0
40	0	0	0	0	0	0	0	0	0	0	0	0	0	0	0	0	0	0	0	0	0
41	0	0	0	0	0	0	0	0	0	0	4	0	0	0	0	0	3	0	0	0	0
42	0	0	0	0	0	4	0	0	0	0	0	0	0	3	3	4	0	0	0	0	0
43	0	0	0	0	0	3	0	0	0	4	0	0	0	0	0	3	0	0	0	0	0
44	0	0	0	0	0	0	0	0	0	0	0	0	0	0	0	0	0	0	0	0	0
45	0	0	0	0	0	0	0	0	0	0	0	0	0	0	0	0	0	0	0	0	0
46	0	0	0	0	0	0	0	0	0	0	0	0	0	3	3	3	0	3	0	0	0
47	0	0	0	0	0	0	0	0	0	0	0	0	0	0	0	0	0	0	0	0	0
48	0	0	0	0	0	0	0	0	0	0	0	0	0	0	0	1	0	0	0	0	0
49	0	0	0	0	0	0	0	0	0	0	0	0	0	0	3	2	0	0	0	0	0
50	0	0	0	0	0	2	0	lymphocytic	0	0	0	0	0	2	2	4	0	3	0	0	0
51	0	0	0	0	0	0	0	0	0	0	0	0	0	3	0	0	0	3	0	0	0
52	0	0	0	0	0	0	0	0	0	0	0	0	0	0	0	0	0	0	0	0	0
53	0	0	0	0	0	0	0	0	0	0	4	0	0	0	0	0	0	0	0	0	0
54	0	0	0	0	0	0	0	0	0	0	0	0	0	0	0	0	0	0	0	0	0
55	1	0	0	0	0	3	0	0	0	0	0	0	0	0	0	2	0	0	0	0	0
56	0	0	0	0	0	0	0	0	0	0	0	0	0	0	0	0	0	0	0	0	0
57	0	0	0	0	0	0	0	0	0	0	0	0	0	0	0	0	0	0	0	0	0
58	0	3-4 weeks	0	0	0	0	0	0	0	0	0	0	0	0	0	4	0	0	0	0	0
59	0	0	0	0	0	0	0	0	0	0	0	0	2	0	0	0	0	0	3	0	0
60	0	0	0	0	0	0	0	0	0	0	0	0	0	0	0	0	0	0	0	0	0
61	0	0	0	0	0	0	0	0	0	0	0	0	0	0	0	0	0	0	0	0	0
62	0	0	0	0	0	4	0	0	0	0	0	0	0	0	0	4	0	0	0	0	0
63	0	0	0	0	0	2	0	0	0	0	0	0	2	0	2	3	0	0	0	0	0
64	0	0	0	0	0	0	0	0	0	0	0	0	0	0	0	0	0	0	0	0	0
65	0	0	0	0	0	0	0	0	0	0	0	0	0	0	0	2	0	0	0	0	0
66	0	0	0	0	0	0	0	0	0	4	0	0	0	0	0	3	0	0	3	0	0
67	0	0	0	0	0	0	0	0	0	0	0	0	0	0	0	4	0	0	0	0	4
68	0	0	0	0	0	2	0	0	0	4	0	0	0	2	0	4	0	0	0	4	0
69	0	0	0	0	0	2	0	0	0	0	0	0	0	3	0	2	0	2	0	0	0
70	0	0	0	0	0	4	0	0	0	3	0	0	0	3	0	4	0	0	0	0	0
71	0	0	0	2	0	2	0	0	0	3	0	0	2	3	0	2	0	0	0	2	0
72	0	0	0	2	0	0	0	0	0	0	0	0	0	0	0	2	0	0	0	2	0
73	0	0	0	0	0	0	0	0	0	0	0	0	0	0	0	2	0	0	0	2	0
74	0	0	0	0	0	0	0	0	0	0	0	0	0	0	0	3	0	0	0	0	0
75	0	0	0	0	0	4	0	0	0	4	0	0	0	0	0	4	0	0	0	0	0
76	0	0	0	0	0	0	0	0	0	4	0	0	0	0	0	1	0	0	0	0	0
77	0	0	0	0	0	0	0	0	0	0	0	0	0	3	3	1	0	0	0	0	0
78	0	0	0	0	0	3	0	0	0	4	0	0	0	2	3	4	0	0	3	2	0
79	0	0	0	0	0	2	0	0	0	0	0	0	2	3	3	2	0	3	0	0	0
80	0	0	0	0	0	0	0	0	0	4	0	0	0	0	2	2	0	0	0	0	0
81	0	0	0	1	0	0	0	0	0	3	0	0	0	3	0	2	0	0	0	0	0
82	0	0	0	0	0	0	0	0	0	0	0	0	0	0	0	2	0	0	0	0	0
83	0	0	0	0	0	0	0	0	0	0	0	0	0	0	0	0	0	0	0	0	0
84	0	0	0	0	0	0	0	0	0	0	0	0	0	0	3	0	0	0	0	0	0
85	0	3 necrosis	3	0	0	0	0	lymphocytic	0	4	0	0	0	3	2	0	0	3	0	0	0
86	0	0	0	2	0	0	0	0	0	4	0	0	2	3	0	0	0	0	0	0	0
87	0	0	0	2	0	4	0	0	0	0	0	3	2	0	0	4	0	0	0	0	0
88	0	necrosis	3	3	0	0	0	0	0	0	0	0	2	0	2	3	0	0	0	3	0
89	0	0	0	0	0	0	0	0	0	0	0	0	0	2	0	3	0	0	0	0	0
90	0	2 necrosis	0	2	0	0	0	0	0	0	0	0	2	0	0	3	0	0	0	0	0
91	0	3 necrosis	3	3	0	0	0	0	0	0	0	0	0	0	0	2	0	0	0	0	0
92	0	0	0	0	0	0	0	0	0	0	0	0	0	3	0	0	0	0	0	0	0
93	0	0	0	0	0	0	0	0	0	4	0	0	0	0	0	4	0	0	0	0	0
94	0	0	0	0	0	0	0	0	0	0	0	0	0	0	0	3	0	0	0	0	0
95	0	0	0	0	0	0	0	0	0	0	0	0	in vessels	0	0	1	0	0	0	0	0
96	0	0	0	0	0	0	0	0	0	3	0	0	0	3	0	3	0	0	0	0	0
97	0	0	0	0	0	3	0	0	0	0	0	0	0	0	0	3	0	0	0	0	0
98	0	0	0	0	0	0	0	0	0	0	0	0	0	0	0	3	0	0	0	3	0
99	0	0	0	0	0	2	0	0	0	0	0	0	0	0	0	2	0	0	0	0	0
100	0	0	0	0	0	0	0	0	0	0	0	0	in vessels	0	0	1	0	0	0	0	0
101	0	0	0	0	0	0	0	0	0	0	0	0	0	0	0	2	0	0	0	0	0
102	0	0	0	0	0	0	0	0	0	4	0	0	0	0	0	2	0	0	0	0	0
103	0	0	0	0	lymphocytic	0	0	0	0	0	0	0	0	0	0	0	0	0	0	0	0
104	0	0	0	0	0	0	0	0	0	0	0	0	0	3	3	3	0	3	0	0	0
105	0	0	0	0	0	0	0	0	0	0	0	0	0	0	0	0	0	0	0	0	0
106	0	0	0	0	0	3	0	0	0	3	0	0	in vessels	0	0	4	0	0	0	0	0
107	0	0	0	0	0	0	0	0	0	0	0	0	in vessels	0	0	4	0	0	0	3	0
108	0	0	0	0	0	0	0	0	0	0	0	0	0	3	0	2	0	0	0	0	0
109	0	0	0	0	0	0	0	0	0	0	0	0	0	0	0	0	0	0	0	0	0
110	0	0	0	0	0	4	0	0	0	0	0	0	0	0	0	3	0	0	0	0	0
111	0	0	0	0	0	0	0	0	0	3	0	0	0	3	0	1	0	0	0	0	0
112	0	3 areactive necrosis	0	0	0	0	0	0	0	0	0	0	2	0	0	1	0	0	0	0	0
113	0	0	0	0	0	0	0	0	0	0	0	0	0	2	0	2	0	0	0	0	0
114	0	0	0	0	0	0	0	0	0	0	0	0	0	0	0	0	0	0	4	0	0
115	0	0	0	0	0	3	0	0	0	0	0	0	2	0	0	3	0	0	0	0	0
116	0	2-3 weeks	0	0	0	0	0	0	0	3	0	0	0	0	0	3	0	0	0	0	0
117	0	0	0	0	0	0	0	0	0	0	0	0	in vessels	0	0	3	0	0	0	0	0
118	0	0	0	0	0	0	0	0	0	0	0	0	0	0	0	2	0	0	0	0	0
119	0	0	0	0	0	0	0	0	0	0	0	0	0	0	4	3	3	0	0	0	0
% trait in group	0.00840336	0.109244	0.0588235	0.0672269	0.00840336	0.260504	0	0.0168067	0	0.226891	0.0252101	0.00840336	0.210084	0.243697	0.243697	0.689076	0.0252101	0.10084	0.0336134	0.0840336	0.0336134

## Sheet: wave 3, clinic
№	Sex	Duration for onset of symptoms	Death per sick day	Invasive ventilation	Age, years	CRP, mg/l	Procalcitonin, ng/ml	Ferritin, mcg/l	D-dimer, mcg/ml	Troponin I, ng/ml	Lymphocytes, x10^9/l	%spO2	%CT	Ejection fraction %	Hypertensive heart disease	Chronic heart failure	Atrial fibrillation	Conduction blocks	Extrasystoles	Acute kidney injury	Cardiac ischemia	Diabetes	Cerebrovascular accident	Oncological diseases	Cerebrovascular disease	Others
Patients without myocarditis
1	F	12	13	0	61	411.29	0.293	961.3	5.92	0.656	1.51	95	90		3	0	0	0	0	0	1	0	0	0	0	0
2	F	7	24	1	81	24.19	0.08	185.1	0.08	0.1	0.79	94	20		2	2	1	0	0	0	1	0	0	0	0	0
3	F	8	22	0	83	43.76	0.048	1201.3	5.16	0.1	0.62	94	45	27	3	0	1	AV block type 2	0	0	1	0	0	0	1	0
4	F	3	17	1	73	171.11	0.094	738.4	0.91	0.1	1.01	77	20	65	3	2	1	0	0	0	1	1	1	0	0	0
5	F	14	16	1	93	119.45	2.15	1297.9	6.8	1.25	0.62	92	25		3	0	0	0	0	0	1	1	0	0	1	0
6	F	8	18	1	80	88.26	0.174	246.5	1.1	0.1	0.33	93	23	60	3	0	1	Right bundle branch block	0	0	0	0	0	Stomach cancer	0	Chronic obstructive pulmonary disease
7	F	9	19	1	80	265.02	0.202	1827.2	0.38	0.1	0.83	75	76		3	0	0	Right bundle branch block	0	0	0	0	0	0	0	0
8	M	8	20	1	67	116.93	0.121	768.1	0.27	0.1	0.93	92	48		0	0	0	Right bundle branch block	0	0	0	0	0	0	0	0
9	F	9	21	1	49	250.04	0.069	570.8	0.4	0.252	0.48	55	75	60	2	0	0	Right bundle branch block	0	0	0	0	0	0	0	Rheumatoid arthritis
10	F	8	21	1	74	175.49	0.262	790.3	1.26	0.1	3.8	93	45		2	0	1	0	0	0	0	1	0	0	0	0
11	F	6	15	1	86	34.16	0.071	821.4	0.26	0.1	0.58	82	60		3	3	1	0	0	0	1	1	0	0	0	Chronic obstructive pulmonary disease
12	M	3	13	1	83	183.53	0.937	1625	0.37	0.323	0.23	77	78		3	3	0	0	0	0	1	1	0	0	1	0
13	F	1	9	1	84	135.05	0.557	2249.8		0.213	0.39	90	20		3	2	0	0	0	1	1	0	0	0	1	0
14	F	11	6	1	82	201.65	0.469	1082.9	0.56	1.71	0.55	77	76		3	2	0	0	0	0	1	0	0	0	1	0
15	F	6	11	0	72	254.69	0.334	767.3	1.03	0.105	0.61	96	50	65	3	2	0	0	0	0	1	1	0	0	0	0
16	M	3	10	1	53	87.25	0.119	361.4	0.16	0.1	0.36	86	60		3	0	0	0	0	0	0	1	0	0	0	0
17	F	6	14	1	74	26.46	0.139	227.9	0.52	0.1	47.74	94	40		3	0	0	0	0	0	1	1	0	Chronic lymphocytic leukemia	1	0
18	F	8	14	1	92	129.01	0.078	1331.7	0.24	0.172	0.71	92	50		3	0	1	Right bundle branch block	0	1	0	1	0	0	1	0
19	M	11	10	1	58	387.21	1.52	2370.2	7	1.42	0.7	72	15	55	3	0	0	0	0	0	0	0	0	0	1	0
20	F	6	13	0	68	22.57	0.095	284.3	0.16	0.1	0.79	94	20		3	2	1	0	0	0	0	0	0	0	0	Chronic obstructive pulmonary disease
21	M	5	8	0	81	181.86	0.529	1528.7	0.91	0.1	0.38	79	65		3	0	1	0	0	0	1	1	0	0	1	0
22	F	3	7	1	92	8.52	0.205	150	1.1	0.756	0.49	95	0	62	3	2	0	Left bundle branch block	0	1	1	1	0	0	1	0
23	M	17	21	1	81	17.76	0.234	138.6	0.53	0.572	0.86	92	0	30	3	2	1	0	0	0	1	1	0	0	1	Acute myocardial infarction
24	M	6	7	1	59	238.51	2.66	2131.8	1.4	0.188	0.38	96			3	2	0	0	0	0	1	1	0	0	0	Dilated cardiomyopathy
25	M	4	27	1	69	191.34	0.099	1830.8	0.45	0.1	0.15	70	70		3	0	1	Right bundle branch block	0	0	0	0	0	Multiple myeloma	0	0
26	M	7	16	0	55	164.52	0.359	2429.2	0.3	0.1	0.46	84	35		2	0	1	Right bundle branch block	0	0	0	1	0	0	0	0
27	M	8	36	1	64	72.43	0.084	1265.6	0.24	0.1	0.64	95	70		2	0	1	AV block type 2	0	0	0	0	0	0	0	0
28	F	8	17	0	85	54.16	0.133	102.3	0.95	0.1	0.77	94	0	30	3	2	0	Right bundle branch block	0	0	1	0	0	0	0	0
29	F	1	31	1	71	56.4	0.131	2099.3	0.62	0.1	0.69	94	70		0	0	0	0	0	0	0	1	0	0	0	0
30	M	6	19	0	49	35.39	0.157	1363.4	0.4	0.1	0.62	92	40		2	0	0	Right bundle branch block	0	0	0	0	0	0	0	0
31	M	7	16	1	77	59.44	0.026	704	0.16	0.1	0.45	97	20		3	0	0	Left bundle branch block	Ventricular extrasystole	0	0	0	0	0	0	0
32	M	6	24	1	68	22.08	0.06	286	0.16	0.1	1.2	95	4	69	3	0	0	0	Ventricular extrasystole	0	0	1	0	0	0	0
33	F	6	17	1	88	47.81	0.144	252.1	0.39	0.1	0.3	90	36	55	3	0	1	0	0	0	0	1	0	0	1	0
34	F	4	16	1	67	46.24	0.085	540.7	0.12	0.1	0.73	89	35		2	0	1	0	0	0	0	1	0	0	0	0
35	M	17	36	1	60	112.85	0.054	1596.1	0.49	0.1	0.53	79	85	48	2	0	0	Right bundle branch block	0	0	0	0	0	0	0	HIV/AIDS
36	F	10	45	1	88	60.34	0.199	869.3	0.46	0.1	0.76	91	44	57	2	0	1	Left bundle branch block	0	0	0	1	0	0	1	0
37	M	7	26	1	69	91.88	0.144	1086	0.41	0.1	0.46	86	70		1	0	1	0	0	0	0	0	0	0	0	Rheumatoid arthritis
38	M	15	24	1	90	102.29	0.103	1910.3	0.72	0.1	0.56	88	40	47	3	3	1	0	0	0	0	0	0	0	1	0
39	F	17	24	1	91	73.6	0.135	549.3	0.55	0.1	0.68	93	30	55	3	0	1	0	0	0	0	0	0	0	0	0
40	F	18	27	1	55	164.6	2.57	722.6	2.3	0.1	1.59	95	92	62	3	0	0	0	0	0	0	0	0	0	0	0
41	M	9	25	1	74	17.62	0.121	2305.2	0.6	0.1	0.57	86	24		3	0	0	Left bundle branch block	Ventricular extrasystole	0	0	0	0	0	0	0
42	F	11	19	0	64	70.85	0.091	84.4	0.31	0.1	0.5	89	48	60	3	0	0	Right bundle branch block	0	0	1	1	0	0	0	Rheumatoid arthritis
43	M	4	14	1	67	16.28	0.063	810.4	0.13	0.1	1.03	94	3		3	0	0	Right bundle branch block	0	0	0	0	0	0	0	0
44	F	1	30	0	86	0.79	2.75	157.3	0.82	0.116	0.3	80	20	64	3	3	1	0	0	0	1	1	0	0	1	0
45	F	35	52	1	72	16.8	0.035	354	0.19	0.1	1.29	89	22		3	2	0	0	0	0	0	0	0	0	1	Dilated cardiomyopathy
46	M	14	22	1	60	37.73	0.141	1994.6	0.63		0.87	70	65	59	2	2	1	0	0	0	1	1	0	0	0	0
47	F	8	14	1	76	60.86	0.22	533.5	0.94	0.172	0.4	98	0	32	3	0	1	0	0	0	0	0	0	Stomach cancer	1	0
48	F	8	13	0	69	47.46	0.152	417.1	0.85	0.511	0.3	91	40		3	2	1	0	0	0	0	0	0	0	0	0
49	F	5	29	1	82	31.22	0.282	280.4	0.56	0.1	1.07	88	20		2	0	0	Left bundle branch block	0	0	0	0	0	0	0	0
50	F	8	30	1	58	252.4	0.128	1120.8	0.5	0.1	0.99	80	52		2	0	0	0	0	0	0	1	0	0	0	0
51	M	10	29	1	47	109.08	0.129	2246.2		0.1	0.76	80	30	26	3	0	0	Left bundle branch block	Ventricular extrasystole	0	0	0	0	0	0	0
52	F	8	17	0	83	68.84	0.081	283.9	0.63	0.1	0.95	93	12	36	3	0	0	0	0	0	0	1	0	0	0	0
53	F	2	9	1	71	101.06	0.255	918.1	2.63	0.1	0.81	91	95		3	2	0	0	0	0	1	1	0	Сolon cancer	1	0
54	F	9	14	1	80	4.99	0.09	532.2	0.44	0.1	0.8	92	28	61	3	0	1	0	Ventricular extrasystole	0	0	1	0	0	0	0
55	F	8	28	1	71	200.45	0.92	637.5	6.33	0.1	1.08	80	40		3	1	0	Right bundle branch block	0	0	1	0	0	0	0	0
56	M	10	25	1	63	222.43	0.615	2180	5.75		0.54	95	85		3	2	0	Right bundle branch block	0	0	1	0	0	Сolon cancer	1	0
57	M	6	21	1	45	130.25	0.124	2449.6	0.98	0.1	0.69	80	60	22	3	2	1	Left bundle branch block	0	0	0	0	0	0	0	0
58	F	9	28	1	84	30.59	0.34	2371.4	0.53	0.1	0.28	91	8	68	3	0	0	0	0	0	0	0	0	Non-Hodgkin's lymphoma	0	0
59	F	9	14	0	57	30.26	0.448	2146.2	0.84	0.1	1.29	89	70		2	0	0	0	0	0	0	0	0	0	0	0
60	M	4	16	1	72	13.94	0.085	1421.7	0.47	0.1	0.75	90	40		2	0	0	Left bundle branch block	0	0	0	1	0	0	0	0
61	F	4	21	0	77	2.97	0.134	318.9	0.1	0.1	1.77	94	0		3	2	1	Left bundle branch block	0	0	1	1	0	0	0	0
62	F	10	26	0	52	109.8	0.058	1104.9	6.3	0.1	0.97	85	50	69	0	0	0	0	0	0	0	0	0	0	0	0
63	F	11	34	1	42	99.62	0.116	500.9	5.4	0.1	0.7	50	75	60	1	0	0	Right bundle branch block	0	0	0	0	0	0	0	0
64	F	10	40	0	75	479.6	0.149	182.61	0.24	0.1	0.72	93	35	66	3	2	0	0	0	0	0	1	0	0	1	0
65	M	9	25	1	69	46.98	0.04	812.1	0.18	0.1	1.33	92	50		3	0	0	0	0	0	1	1	0	0	0	0
66	F	8	18	1	72	8.86	0.207	58.2	1.17	0.1	0.61	94	30	60	3	2	0	0	0	0	1	1	0	0	0	0
67	M	14	29	1	66	217.39	0.126	1033.8	1.07	0.114	0.94	73	65	40	3	2	0	0	0	0	1	0	0	0	0	0
68	M	8	16	1	29	160.15	0.213	994.2	0.64	0.1	0.72	70	90	39	0	0	0	0	0	0	0	0	0	0	0	Chronic obstructive pulmonary disease
69	F	5	10	1	74	141.98	0.51	1407.7	0.57	0.1	1.09	90	40		3	2	0	0	0	0	1	1	0	0	1	0
70	F	8	30	1	49	319.7	0.398	1618.9	0.71	0.1	0.57	97	40		3	0	0	0	0	0	0	0	0	0	0	0
71	F	34	38	0	91	80.99	0.329	365.6	0.69	0.1	0.31	88	50	60	3	3	0	Left bundle branch block	0	0	1	0	0	0	0	0
72	F	7	24	1	70	49.35	0.179	2059.6	0.49	0.1	0.88	77	25	59	2	0	0	0	0	0	0	1	0	0	0	0
73	F	10	30	1	61	157.35	0.095	1002	0.5	0.1	0.51	89	40	60	3	3	1	0	0	0	1	1	0	0	1	0
Descriptive statistics															n, %	n, %	n, %	n, %	n, %	n, %	n, %	n, %	n, %	n, %	n, %	n, %
Volume samples, n		73	73	73	73	73	73	73	71	71	72	73	72	34	Stage III	Stage III	Present	Right bundle branch block	Ventricular extrasystole	Present	Present	Present	Present	Multiple myeloma	Present	Acute myocardial infarction
Minimum		1	6		29	0.79	0.026	58.2	0.08	0.1	0.15	50	0	22	52	6	27	15	5	3	29	34	1	1	22	1
Maximum		35	52		93	479.6	2.75	2449.6	7	1.71	3.8	98	95	69	0.712329	0.0821918	0.369863	0.205479	0.0684932	0.0410959	0.39726	0.465753	0.0136986	0.0136986	0.30137	0.0136986
Arithmetic mean M		8.69863	21.0959	0.77	70.6849	113.257	0.349959	1040.67	1.23141	0.197606	0.762917	87.0137	42.9722	52.5882	Stage II	Stage II	Absent	Left bundle branch block	Without extrasystoles	Absent	Absent	Absent	Absent	Chronic lymphocytic leukemia	Absent	Chronic obstructive pulmonary disease
Standard deviation sd		5.75346	9.20773		13.6177	101.21	0.581943	727.629	1.8066	0.297992	0.487796	9.44648	25.6724	14.0973	15	21	46	10	68	70	44	39	72	1	51	4
Confidence interval 95% CI		1.34238	2.14832		3.17724	23.6139	0.135777	169.768	0.427614	0.0705336	0.114626	2.20403	6.03271	4.91879	0.205479	0.287671	0.630137	0.136986	0.931507	0.958904	0.60274	0.534247	0.986301	0.0136986	0.69863	0.0547945
Sample median Me		8	20		72	87.25	0.141	869.3	0.56	0.1	0.695	90	40	59.5	Stage I	Stage I		AV block type 2						Stomach cancer		Rheumatoid arthritis
Percentile 25%		6	14		61	35.39	0.094	365.6	0.375	0.1	0.4975	80	22.75	41.75	2	1		2						2		3
Percentile 75%		10	27		81	164.6	0.293	1596.1	0.965	0.1	0.8925	94	65	61.75	0.0273973	0.0136986		0.0273973						0.0273973		0.0410959
95% lower confidence limit Me		7	16		68	54.16	0.121	637.5	0.46	0.1	0.58	88	35	47	Without hypertension	Without heart failure		Without сonduction blocks						Non-Hodgkin's lymphoma		HIV/AIDS
95% upper confidence limit Me		9	24		75	116.93	0.202	1120.8	0.71	0.1	0.76	92	50	60	4	45		46						1		1
Coefficient of variation CV=sd/M [0,1]		0.661422	0.43647		0.192653	0.893625	1.66289	0.699194	1.4671	1.50802	0.639383	0.108563	0.597417	0.26807	0.0547945	0.616438		0.630137						0.0136986		0.0136986
Root mean square error m [0.5]		0.673392	1.07768		1.59383	11.8457	0.0681112	85.1626	0.214404	0.0353652	0.0574873	1.10563	3.02552	2.41767										Сolon cancer		Dilated cardiomyopathy
Asymmetry As [±0.2]		2.58086	0.819705		-0.541141	1.44122	3.20516	0.503609	2.31693	3.75206	3.65194	-1.69172	0.169152	-0.91127										2		2
Extsess Ex [±1]		9.746	0.920504		0.0784087	2.276	9.86758	-0.982332	3.99515	14.3699	20.6612	3.42204	-0.784883	-0.546388										0.0273973		0.0273973
M+sd		14.4521	30.3036		84.3026	214.467	0.931901	1768.3	3.038	0.495598	1.25071	96.4602	68.6446	66.6856										Without oncological diseases		Without others diseases
Percentile 84%		11	29.48		84	201.026	0.45808	2025.8	1.242	0.172	1.0228	94	70	64.72										66		62
M-sd		2.94517	11.8882		57.0673	12.0477	-0.231984	313.039	-0.575188	-0.100387	0.275121	77.5672	17.2999	38.4909										0.90411		0.849315
Percentile 16%		4	13		57.52	23.4124	0.08052	282.22	0.24	0.1	0.3936	78.04	20	33.12
M+2sd		20.2056	39.5114		97.9203	315.676	1.51384	2495.93	4.8446	0.79359	1.73851	105.907	94.3169	80.7829
Percentile 97,5%		21.2	41		92	392.026	2.588	2382.96	6.4475	1.2925	1.6305	97	90.45	69
M-2sd		-2.8083	2.68042		43.4496	-89.1619	-0.813926	-414.59	-2.38178	-0.398379	-0.212675	68.1207	-8.37248	24.3936
Percentile 2,5%		1	7		44.4	4.586	0.039	98.72	0.115	0.1	0.26875	67	0	25.3
Number of intervals k		7.18623	7.18623		7.18623	7.18623	7.18623	7.18623	7.14618	7.14618	7.16634	7.18623	7.16634	6.08451
											Values highlighted in red were not taken into account in the overall statistics, as these patients have an anamnesis of leukemia
Patients with myocarditis
1	F	5	16	1	73	170.63	0.623	1232.7	0.44	0.1	1.32	75	56		3	2	0	0	0	0	1	1	0	0	0	Rheumatoid arthritis
2	F	7	22	1	84	50.49	0.148	106.2	0.35	0.1	0.61	90	65	48	3	0	1	0	0	0	0	1	0	0	1	0
3	F	8	23	0	86	34.69	0.083	419.5	0.21	0.157	0.83	93	20	55	3	0	1	Right bundle branch block	Ventricular extrasystole	0	1	1	0	0	1	0
4	F	11	24	1	82	25.7	0.033	263.3	0.19	0.668	0.25	86	60	70	3	0	0	0	0	0	1	1	0	0	0	0
5	F	12	13	0	59	27.8	4.77		5.92	0.059	0.72	87		55	0	0	1	0	0	0	0	0	0	0	0	0
Descriptive statistics															n, %	n, %	n, %	n, %	n, %	n, %	n, %	n, %	n, %	n, %	n, %	n, %
Volume samples, n		5	5	5	5	5	5	4	5	5	5	5	4	4	Stage III	Stage III	Present	Right bundle branch block	Ventricular extrasystole	Present	Present	Present	Present	Without oncological diseases	Present	Rheumatoid arthritis
Minimum		5	13		59	25.7	0.033	106.2	0.19	0.059	0.25	75	20	48	4	0	3	1	1	0	3	4	0	5	2	1
Maximum		12	24		86	170.63	4.77	1232.7	5.92	0.668	1.32	93	65	70	0.8	0	0.6	0.2	0.2	0	0.6	0.8	0	1	0.4	0.2
Arithmetic mean M		8.6	19.6	0.6	76.8	61.862	1.1314	505.425	1.422	0.2168	0.746	86.2	50.25	57	Stage II	Stage II	Absent	Without сonduction blocks	Without extrasystoles	Absent	Absent	Absent	Absent		Absent	Without others diseases
Standard deviation sd		2.88097	4.82701		11.1221	61.5752	1.86273	448.499	2.32988	0.240066	0.359082	6.32681	18.3358	8.29458	0	1	2	4	4	5	2	1	5		3	4
Confidence interval 95% CI		3.5772	5.99352		13.8098	76.4557	0.695556	238.988	1.29025	0.171733	0.198853	3.50367	9.77044	4.41987	0	0.2	0.4	0.8	0.8	1	0.4	0.2	1		0.6	0.8
Sample median Me		8	22		82	34.69	0.148	341.4	0.35	0.1	0.72	87	56	55	Stage I	Stage I
Percentile 25%		7	16		73	27.8	0.083	224.025	0.21	0.1	0.61	86	47	53.25	0	0
Percentile 75%		11	23		84	50.49	0.623	622.8	0.44	0.157	0.83	90	61.25	58.75	0	0
95% lower confidence limit Me		7	16		73	27.8	0.033	419.5	0.21	0.1	0.83	93	20	70	Without hypertension	Without heart failure
95% upper confidence limit Me		11	23		84	50.49	0.623	1232.7	0.35	0.668	0.61	75	58	48	1	4
Coefficient of variation CV=sd/M [0,1]		0.334997	0.246276		0.144818	0.995364	1.6464	0.88737	1.63845	1.10732	0.481343	0.0733969	0.364891	0.145519	0.2	0.8
Root mean square error m [0.5]		1.28841	2.1587		4.97393	27.5373	0.340087	112.125	0.601573	0.0759156	0.0927146	1.63358	4.58394	2.07364
Asymmetry As [±0.2]		0.0376379	-0.725532		-1.33319	2.10318	1.53012	1.03445	1.66513	1.69705	0.347942	-1.01059	-1.15461	0.775434
Extsess Ex [±1]		-1.80433	-1.99727		1.08221	4.48461	0.445712	-0.668605	0.885412	1.23965	-0.408768	-0.048808	-0.5538	-0.748979
M+sd		11.481	24.427		87.9221	123.437	2.99413	953.924	3.75188	0.456866	1.10508	92.5268	68.5858	65.2946
Percentile 84%		11.36	23.36		84.72	93.7404	4.77	1232.7	4.6048	0.44316	1.2024	92.28	65	70
M-sd		5.71903	14.773		65.6779	0.286786	-0.731333	56.9261	-0.907881	-0.0232661	0.386918	79.8732	31.9142	48.7054
Percentile 16%		6.28	14.92		67.96	27.044	0.033	106.2	0.1948	0.07704	0.3364	77.64	20	48
M+2sd		14.3619	29.254		99.0441	185.012	4.85687	1402.42	6.08176	0.696932	1.46416	98.8536	86.9215	73.5892
Percentile 97,5%		11.9	23.9		85.8	158.616	4.77	1232.7	5.92	0.668	1.32	93	65	70
M-2sd		2.83806	9.94599		54.5559	-61.2884	-2.59407	-391.573	-3.23776	-0.263332	0.0278357	73.5464	13.5785	40.4108
Percentile 2,5%		5.2	13.3		60.4	25.91	0.033	106.2	0.19	0.059	0.25	75	20	48
Number of intervals k		3.32058	3.32058		3.32058	3.32058	5.90404	4.99768	4.90462	4.32	4.90462	4.90462	4.99768	4.99768
General statistics of all patients															n, %	n, %	n, %	n, %	n, %	n, %	n, %	n, %	n, %	n, %	n, %	n, %
Volume samples, n		78	78	78	78	78	78	77	76	76	77	78	76	38	Stage III	Stage III	Present	Right bundle branch block	Ventricular extrasystole	Present	Present	Present	Present	Multiple myeloma	Present	Acute myocardial infarction
Minimum		1	6		29	0.79	0.026	58.2	0.08	0.059	0.15	50	0	22	56	6	30	16	6	3	32	38	1	1	24	1
Maximum		35	52		93	479.6	4.77	2449.6	7	1.71	3.8	98	95	70	0.717949	0.0769231	0.384615	0.205128	0.0769231	0.0384615	0.410256	0.487179	0.0128205	0.0128205	0.307692	0.0128205
Arithmetic mean M		8.69231	21	0.76	71.0769	109.963	0.400051	1012.86	1.24395	0.198868	0.761818	86.9615	43.3553	53.0526	Stage II	Stage II	Absent	Left bundle branch block	Without extrasystoles	Absent	Absent	Absent	Absent	Chronic lymphocytic leukemia	Absent	Chronic obstructive pulmonary disease
Standard deviation sd		5.6022	8.97905		13.4944	99.678	0.756027	725.12	1.84017	0.293871	0.479818	9.26863	25.3654	13.642	15	22	48	10	72	75	46	40	77	1	54	4
Confidence interval 95% CI		1.2631	2.02446		3.04251	22.4739	0.170458	164.582	0.420497	0.0671525	0.108905	2.08975	5.79625	4.48403	0.192308	0.282051	0.615385	0.128205	0.923077	0.961538	0.589744	0.512821	0.987179	0.0128205	0.692308	0.0512821
Sample median Me		8	20.5		72	77.295	0.1425	821.4	0.54	0.1	0.7	90	40	59	Stage I	Stage I		AV block type 2						Stomach cancer		Rheumatoid arthritis
Percentile 25%		6	14		61.5	34.2925	0.09175	361.4	0.34	0.1	0.5	80.5	22.75	47.25	2	1		2						2		4
Percentile 75%		10	26		82	164.58	0.32	1528.7	0.9575	0.1	0.88	93.75	65	61.75	0.025641	0.0128205		0.025641						0.025641		0.0512821
95% lower confidence limit Me		7	16		68	49.35	0.121	570.8	0.45	0.1	0.61	88	35	48	Without hypertension	Without heart failure		Without сonduction blocks						Non-Hodgkin's lymphoma		HIV/AIDS
95% upper confidence limit Me		9	24		76	112.85	0.202	1104.9	0.82	0.1	0.76	92	50	60	5	49		50						1		1
Coefficient of variation CV=sd/M [0,1]		0.644501	0.427574		0.189856	0.906471	1.88983	0.715911	1.4793	1.47772	0.629833	0.106583	0.58506	0.257142	0.0641026	0.628205		0.641026						0.0128205		0.0128205
Root mean square error m [0.5]		0.634324	1.01668		1.52794	11.2863	0.0856032	82.6351	0.211082	0.0337093	0.0546804	1.04947	2.90962	2.21303										Сolon cancer		Dilated cardiomyopathy
Asymmetry As [±0.2]		2.61227	0.846322		-0.576967	1.48522	3.82241	0.545733	2.24045	3.68482	3.58934	-1.67934	0.124028	-0.940307										2		2
Extsess Ex [±1]		10.2175	1.09259		0.0897046	2.44737	16.4307	-0.924542	3.56956	14.0785	20.5678	3.45566	-0.791337	-0.30093										0.025641		0.025641
M+sd		14.2945	29.9791		84.5713	209.641	1.15608	1737.98	3.08412	0.49274	1.24164	96.2302	68.7207	66.6947										Without oncological diseases		Without others diseases
Percentile 84%		11	29		84	197.535	0.49688	1981.11	1.26	0.172	1.0268	94	70	65										71		66
M-sd		3.09011	12.0209		57.5826	10.2847	-0.355976	287.744	-0.596224	-0.0950029	0.282	77.6929	17.9898	39.4106										0.910256		0.846154
Percentile 16%		4.32	13		58	24.6732	0.08032	266.036	0.24	0.1	0.3916	77.64	20	35.68
M+2sd		19.8967	38.9581		98.0657	309.319	1.91211	2463.1	4.92429	0.786611	1.72145	105.499	94.0861	80.3367
Percentile 97,5%		19.2	40.375		92	389.016	2.66675	2377.18	6.38875	1.27125	1.608	97	90.25	69.075
M-2sd		-2.51209	3.0419		44.0882	-89.3934	-1.112	-437.376	-2.43639	-0.388874	-0.197818	68.4243	-7.37561	25.7686
Percentile 2,5%		1	7		44.775	4.8385	0.03485	100.51	0.1175	0.1	0.248	68.875	0	25.7
Number of intervals k		7.28175	7.28175		7.28175	7.28175	7.28175	7.26315	7.2443	7.2443	7.26315	7.28175	7.2443	6.24488
											Values highlighted in red were not taken into account in the overall statistics, as these patients have an anamnesis of leukemia
Analysis of variance between a group of patients with and without myocarditis																Cross-tabulation and Pearson Chi-square for assessing extrasystoles in patients with and without myocarditis					Cross-tabulation and Pearson Chi-square for assessing atrial fibrillation in patients with and without myocarditis					Cross-tabulation and Pearson Chi-square for assessing conduction blocks in patients with and without myocarditis
F critical		3.96676	3.96676		3.96676	3.96676	3.96676	3.96847	3.97023	3.97023	3.96847	3.96676	3.97023	4.11317		Myocarditis	4 (absent exstra.)	1 (present exstra.)	5 (total)		Myocarditis	3 (absent exstra.)	2 (present exstra.)	5 (total)				Conduction blocks
F actual		0.00143163	0.128408		0.960446	1.24808	5.27708	2.09601	3.91428	0.0196668	0.00573546	0.035614	0.309081	0.367907		Without myocarditis	68 (absent exstra.)	5 (present exstra.)	73 (total)		Without myocarditis	46 (absent exstra.)	27 (present exstra.)	73 (total)				Absent	AV block	LBBB	RBBB	Total
R2		0	0.00168673		0.0124797	0.0161568	0.064927	0.027187	0.0502383	0.000265697	7.6467e-05	0.000468385	0.0041594	0.0101163		Pearson Chi-Square	1.14	Asymptotic Significance (2-sided)	0.286		Pearson Chi-Square	1.047	Asymptotic Significance (2-sided)	0.306		Myocarditis	Myocarditis	4	0	0	1	5
							there is a relationship between the groups, but we consider it unreliable, due to the small value of R2 (6,49%), and the influence of only one measurement on the relationship (4.77)																				Without	46	2	10	15	73
																										Total		50	2	10	16	78
																												Chi-Square Tests
																													Value	df	Asymptotic Significance (2-sided)
																												Pearson Chi-Square	1.033	3	0.793211
																												Likelihood Ratio	1.78685	3	0.617801
																												N of Valid Cases	78
Data for charts
		CRP, g/l		Ferritin, mg/l		Procalcitonin, ng/ml		D-dimer, mcg/ml		Troponin I, ng/ml		Lymphocytes, x10^9/l		%spO2		%CT		Ejection fraction %
		Without myocarditis	With myocarditis	Without myocarditis	With myocarditis	Without myocarditis	With myocarditis	Without myocarditis	With myocarditis	Without myocarditis	With myocarditis	Without myocarditis	With myocarditis	Without myocarditis	With myocarditis	Without myocarditis	With myocarditis	Without myocarditis	With myocarditis
Sample median Me		0.09	0.03	0.87	0.34	0.141	0.148	0.56	0.35	0.1	0.1	0.695	0.72	90	87	40	58	59.5	55
Percentile 25%		0.04	0.03	0.37	0.22	0.094	0.083	0.375	0.21	0.1	0.1	0.4975	0.61	80	86	22.75	47	41.75	53.25
Maximum		0.48	0.17	2.45	1.23	2.75	4.77	7	5.92	1.71	0.668	3.8	1.32	98	93	95	65	69	70
Minimum		0	0.03	0.06	0.11	0.03	0.03	0.08	0.19	0.1	0.06	0.15	0.25	50	75	0	20	22	48
Percentile 75%		0.16	0.05	1.57	0.62	0.293	0.623	0.965	0.44	0.1	0.157	0.8925	0.83	94	90	65	61.25	61.75	58.75

## Sheet: morphology 3 wave
Morphological changes in the myocardium
№	Large polymorphic cells	infarction/necrosis	hemorrhagic infarction	thrombi in the arteries	myocarditis	postinfarction cardiosclerosis	thrombi in the endocardium	pericarditis	amyloidosis/glycogenosis	fragmentation of muscle fibers	pustular myocarditis	vasculitis	macrophages	hemorrhage	edema with fibrin	myocardial hypertrophy	cancer metastasis	lipomatosis	microbial emboli	focal plasma impregnation	postmyocardial cardiosclerosis
1	0	0	0	0	0	0	0	0	0	0	0	0	0	0	0	4	0	0	0	0	0
2	0	0	0	0	0	0	0	0	0	0	0	0	0	0	0	2	0	0	0	2	0
3	0	0	0	0	0	0	0	0	0	4	0	0	0	3	0	2	0	0	0	0	0
4	0	0	0	0	lymphocytic-macrophage	0	0	0	0	0	0	productive	2	0	0	2	0	0	0	2	0
5	1	0	0	0	0	0	0	0	0	0	0	0	0	0	0	0	0	0	0	0	0
6	0	0	0	0	0	0	0	0	0	0	0	0	in vessels	0	0	0	0	0	0	0	0
7	0	0	0	0	0	0	0	0	0	4	0	0	0	0	0	3	0	0	0	0	0
8	0	0	0	0	0	0	0	0	0	0	0	0	0	0	0	4	0	0	0	0	0
9	0	0	0	0	0	0	0	0	0	4	0	0	0	0	0	3	0	0	0	0	0
10	0	0	0	0	0	0	0	0	0	4	0	0	0	0	0	0	0	0	0	0	0
11	0	0	0	0	chronic myocarditis	0	0	0	0	3	0	0	2	0	0	3	0	3	0	0	3
12	0	0	0	0	0	0	0	0	0	3	0	0	0	0	3	2	0	0	0	0	0
13	0	0	0	0	0	0	0	0	0	0	0	0	0	2	0	1	0	2	0	0	0
14	0	repeated 2 days	0	0	0	3	0	0	0	3	0	0	0	2	0	3	0	0	0	0	0
15	0	0	0	0	0	3	0	0	0	3	0	0	0	0	0	3	0	2	0	0	0
16	0	0	0	0	0	0	0	0	0	0	0	0	0	0	3	0	0	0	0	0	0
17	0	0	0	0	0	0	0	0	0	0	0	0	2	0	0	4	0	0	0	0	0
18	0	0	0	0	0	0	0	0	0	0	0	0	0	0	0	4	0	0	0	3	0
19	0	0	0	0	0	0	0	0	0	0	0	0	0	0	0	4	0	0	0	2	0
20	0	0	0	0	0	0	0	0	0	0	0	0	0	0	0	0	0	0	0	0	0
21	0	0	0	0	0	0	0	0	0	0	0	0	0	0	3	4	0	0	0	3	0
22	0	0	0	0	0	0	0	0	0	0	0	0	0	0	0	0	0	0	0	0	0
23	0	0	0	0	0	3	0	0	0	0	0	0	0	0	0	0	0	0	0	0	0
24	0	0	0	0	0	0	0	0	0	0	3	0	0	3	0	1	0	0	0	0	0
25	0	0	0	0	0	0	0	0	0	4	0	0	0	0	0	1	0	0	0	0	0
26	0	0	0	0	0	0	0	0	0	4	0	0	0	0	0	0	0	0	0	0	0
27	0	0	0	0	0	0	0	0	0	0	0	0	0	0	3	0	0	0	0	3	0
28	0	0	0	0	0	0	0	0	0	0	0	0	0	0	3	0	0	0	0	3	0
29	0	0	0	0	0	0	0	0	0	0	0	0	0	2	2	3	0	0	0	0	0
30	0	0	0	0	0	3	0	0	0	0	0	0	0	0	0	3	0	0	0	0	0
31	0	0	0	0	0	0	0	0	vascular amyloidosis	0	0	0	0	0	0	3	0	0	0	3	0
32	0	0	0	0	0	0	0	0	0	0	0	0	0	0	0	0	0	0	0	0	0
33	0	0	0	0	0	0	0	lymphocytic	0	0	0	0	0	0	0	1	0	0	0	0	0
34	0	0	0	0	0	0	0	0	0	0	0	0	0	0	0	2	0	0	0	0	0
35	0	0	0	0	lymphocytic-macrophage	0	0	0	0	0	0	0	0	0	0	2	0	0	0	0	0
36	0	0	0	0	0	0	0	0	0	0	0	0	0	0	0	0	0	0	0	0	2
37	0	0	0	0	0	0	0	0	0	4	0	0	in vessels	3	3	0	0	0	0	0	0
38	0	0	0	0	0	0	0	0	0	4	0	0	0	0	2	0	0	0	0	0	0
39	0	0	0	0	0	3	0	0	0	3	0	0	0	0	0	3	0	0	0	0	0
40	0	0	0	0	0	0	0	0	0	3	0	0	0	0	3	3	0	0	0	3	0
41	0	0	0	0	0	0	0	0	0	0	0	0	0	0	3	1	0	0	0	3	0
42	0	0	0	0	0	0	0	0	0	4	0	0	0	0	0	3	0	0	0	3	0
43	0	0	0	0	0	0	0	0	0	3	0	0	0	0	3	4	0	0	0	0	0
44	0	0	0	0	0	0	0	0	0	0	0	0	0	0	3	0	0	0	0	3	0
45	0	0	0	0	0	0	0	0	0	0	0	0	0	0	2	3	0	0	0	0	0
46	0	0	0	0	0	0	0	0	0	0	0	0	0	0	0	4	0	0	0	0	0
47	0	3 necrosis	3	0	0	0	0	0	0	0	0	0	0	0	0	4	0	0	3	0	0
48	0	0	0	0	0	0	0	0	0	4	0	0	0	0	0	2	0	0	0	0	0
49	0	0	0	0	0	2	0	0	0	4	0	0	0	0	0	4	0	0	0	0	0
50	0	0	0	0	0	0	0	0	0	4	0	0	0	0	0	4	0	0	0	2	0
51	0	0	0	0	0	0	0	0	0	0	0	0	0	0	0	0	0	3	0	0	0
52	0	0	0	0	0	0	0	0	0	4	0	0	0	0	0	3	0	0	0	0	0
53	0	0	0	0	0	0	0	0	0	0	0	0	0	0	0	3	0	0	0	0	0
54	0	0	0	0	0	0	0	0	0	0	0	0	0	0	0	0	0	0	0	0	0
55	0	0	0	0	0	0	0	0	0	0	0	0	0	0	0	4	0	0	0	0	0
56	0	0	0	0	0	0	0	0	0	0	0	0	0	0	0	0	0	0	0	0	0
57	0	0	0	0	0	0	0	0	0	0	0	0	0	0	0	2	0	0	0	0	0
58	0	0	0	0	0	0	0	0	0	0	0	0	0	0	0	2	0	0	0	2	0
59	0	0	0	0	0	0	0	0	0	0	0	0	0	3	0	4	0	0	0	0	0
60	0	0	0	0	0	3	0	0	0	0	0	0	0	3	0	4	0	0	0	0	0
61	0	0	0	0	0	0	0	0	0	4	0	0	0	0	0	4	0	0	0	0	0
62	0	0	0	0	lymphocytic-macrophage	0	0	0	0	4	0	0	0	0	0	2	0	0	0	2	0
63	0	0	0	0	0	0	0	0	0	0	0	0	0	3	0	0	0	0	0	0	0
64	0	2-3 days	0	0	0	0	0	0	0	0	0	0	0	0	0	3	0	0	0	0	0
65	0	0	0	0	0	0	0	0	0	4	0	0	0	0	0	0	0	0	0	0	0
66	0	0	0	0	0	0	0	0	0	4	0	0	0	0	0	0	0	0	0	0	0
67	0	0	0	0	0	0	0	lymphocytic	0	3	0	0	0	3	0	0	0	0	0	0	0
68	0	0	0	0	0	0	0	lymphocytic	0	0	0	0	0	3	0	0	0	0	0	0	0
69	0	0	0	0	0	0	0	0	0	0	0	0	0	2	0	0	0	2	0	0	0
70	0	0	0	0	0	0	0	0	0	3	0	0	0	3	0	2	0	0	0	0	0
71	0	0	0	0	lymphocytic-macrophage	0	0	0	0	0	0	0	0	0	0	2	0	0	0	0	0
72	0	0	0	0	0	0	0	0	0	4	0	0	0	0	0	3	0	0	0	0	0
73	0	0	0	0	0	0	0	0	0	0	0	0	0	0	0	3	0	0	0	0	0
74	0	0	0	0	0	0	0	0	0	0	0	0	0	0	0	0	0	0	0	0	0
75	0	0	0	0	0	0	0	0	0	4	0	0	0	0	0	3	0	0	0	0	0
76	0	0	0	0	0	0	0	0	0	0	0	0	0	0	0	3	0	0	0	0	0
77	0	0	0	0	0	0	0	0	0	0	0	0	0	0	0	4	0	0	0	0	0
78	0	0	0	0	0	0	0	0	0	0	0	0	0	0	0	4	0	0	0	0	0
% trait in group	0.0128205	0.0384615	0.0128205	0	0.0641026	0.0897436	0	0.0384615	0.0128205	0.358974	0.0128205	0.0128205	0.0641026	0.166667	0.166667	0.679487	0	0.0641026	0.0128205	0.192308	0.025641
1
2
3

## Sheet: Statistics of morphology
Wave * Postmyocardial_cardiosclerosis Crosstabulation								Wave * Focal_plasma_impregnation Crosstabulation								Wave * Microbial_emboli Crosstabulation								Wave * Lipomatosis Crosstabulation								Wave * Myocardial_hypertrophy Crosstabulation									Wave * Edema_with_fibrin Crosstabulation
Count								Count								Count								Count								Count									Count
		Postmyocardial_cardiosclerosis				Total				Focal_plasma_impregnation				Total				Microbial_emboli			Total					Lipomatosis				Total				Myocardial_hypertrophy					Total				Edema_with_fibrin					Total
		0 point	2 points	3 points	4 points					0 point	2 points	3 points	4 points					0 point	3 points	4 points						0 point	2 points	3 points	4 points					0 point	1 point	2 points	3 points	4 points					0 point	1 point	2 points	3 points	4 points
Wave	Wave 1	77	0	0	0	77		Wave	Wave 1	67	0	2	8	77		Wave	Wave 1	77	0	0	77			Wave	Wave 1	75	0	2	0	77		Wave	Wave 1	41	0	4	9	23	77		Wave	Wave 1	71	0	0	0	6	77
	Wave 2	115	0	0	2	117			Wave 2	109	4	5	1	119			Wave 2	115	3	1	119				Wave 2	107	1	10	1	119			Wave 2	37	8	29	26	19	119			Wave 2	90	1	13	13	2	119
	Wave 3	76	1	1	0	78			Wave 3	63	6	9	0	78			Wave 3	77	1	0	78				Wave 3	73	3	2	0	78			Wave 3	25	5	12	19	17	78			Wave 3	65	0	3	10	0	78
Total		268	1	1	2	272		Total		239	10	16	9	274		Total		269	4	1	274			Total		255	4	14	1	274		Total		103	13	45	54	59	274		Total		226	1	16	23	8	274
Chi-Square Tests								Chi-Square Tests								Chi-Square Tests								Chi-Square Tests								Chi-Square Tests									Chi-Square Tests
	Value	df	Asymptotic Significance (2-sided)						Value	df	Asymptotic Significance (2-sided)						Value	df	Asymptotic Significance (2-sided)						Value	df	Asymptotic Significance (2-sided)						Value	df	Asymptotic Significance (2-sided)							Value	df	Asymptotic Significance (2-sided)
Pearson Chi-Square	7,651a	6	0.264805					Pearson Chi-Square	29,795a	6	4.29923e-05					Pearson Chi-Square	3,418a	4	0.490382					Pearson Chi-Square	10,534a	6	0.103902					Pearson Chi-Square	30,469a	8	0.000174582						Pearson Chi-Square	31,522a	8	0.000113405
Likelihood Ratio	8.39788	6	0.210378					Likelihood Ratio	30.3532	6	3.36733e-05					Likelihood Ratio	4.74326	4	0.31467					Likelihood Ratio	11.146	6	0.0839661					Likelihood Ratio	35.3398	8	2.31842e-05						Likelihood Ratio	41.8928	8	1.41843e-06
N of Valid Cases	272							N of Valid Cases	274							N of Valid Cases	274							N of Valid Cases	274							N of Valid Cases	274								N of Valid Cases	274
a. 9 cells (75,0%) have expected count less than 5. The minimum expected count is ,28.								a. 8 cells (66,7%) have expected count less than 5. The minimum expected count is 2,53.								a. 6 cells (66,7%) have expected count less than 5. The minimum expected count is ,28.								a. 8 cells (66,7%) have expected count less than 5. The minimum expected count is ,28.								a. 2 cells (13,3%) have expected count less than 5. The minimum expected count is 3,65.									a. 8 cells (53,3%) have expected count less than 5. The minimum expected count is ,28.
								Wave * Focal_plasma_impregnation Crosstabulation																								Wave * Myocardial_hypertrophy Crosstabulation									Wave * Edema_with_fibrin Crosstabulation
								Count																								Count									Count
										Focal_plasma_impregnation				Total																				Myocardial_hypertrophy					Total				Edema_with_fibrin					Total
										0 point	2 points	3 points	4 points																					0 point	1 point	2 points	3 points	4 points					0 point	1 point	2 points	3 points	4 points
								Wave	Wave 1	67	0	2	8	77																		Wave	Wave 1	41	0	4	9	23	77		Wave	Wave 1	71	0	0	0	6	77
									Wave 2	109	4	5	1	119																			Wave 2	37	8	29	26	19	119			Wave 2	90	1	13	13	2	119
								Total		176	4	7	9	196																		Total		78	8	33	35	42	196		Total		161	1	13	13	8	196
								Chi-Square Tests																								Chi-Square Tests									Chi-Square Tests
									Value	df	Asymptotic Significance (2-sided)																						Value	df	Asymptotic Significance (2-sided)							Value	df	Asymptotic Significance (2-sided)
								Pearson Chi-Square	12,319a	3	0.00636797																					Pearson Chi-Square	28,072a	4	1.20629e-05						Pearson Chi-Square	23,313a	4	0.000109652
								Likelihood Ratio	14.1211	3	0.00274493																					Likelihood Ratio	32.5957	4	1.44522e-06						Likelihood Ratio	32.7002	4	1.37574e-06
								N of Valid Cases	196																							N of Valid Cases	196								N of Valid Cases	196
								a. 5 cells (62,5%) have expected count less than 5. The minimum expected count is 1,57.																								a. 2 cells (20,0%) have expected count less than 5. The minimum expected count is 3,14.									a. 4 cells (40,0%) have expected count less than 5. The minimum expected count is ,39.
								Wave * Focal_plasma_impregnation Crosstabulation																								Wave * Myocardial_hypertrophy Crosstabulation									Wave * Edema_with_fibrin Crosstabulation
								Count																								Count									Count
										Focal_plasma_impregnation				Total																				Myocardial_hypertrophy					Total				Edema_with_fibrin					Total
										0 point	2 points	3 points	4 points																					0 point	1 point	2 points	3 points	4 points					0 point	1 point	2 points	3 points	4 points
								Wave	Wave 2	109	4	5	1	119																		Wave	Wave 2	37	8	29	26	19	119		Wave	Wave 2	90	1	13	13	2	119
									Wave 3	63	6	9	0	78																			Wave 3	25	5	12	19	17	78			Wave 3	65	0	3	10	0	78
								Total		172	10	14	1	197																		Total		62	13	41	45	36	197		Total		155	1	16	23	2	197
								Chi-Square Tests																								Chi-Square Tests									Chi-Square Tests
									Value	df	Asymptotic Significance (2-sided)																						Value	df	Asymptotic Significance (2-sided)							Value	df	Asymptotic Significance (2-sided)
								Pearson Chi-Square	6,598a	3	0.0858776																					Pearson Chi-Square	2,854a	4	0.582495						Pearson Chi-Square	5,373a	4	0.251092
								Likelihood Ratio	6.8056	3	0.0783591																					Likelihood Ratio	2.91077	4	0.572867						Likelihood Ratio	6.74377	4	0.150064
								N of Valid Cases	197																							N of Valid Cases	197								N of Valid Cases	197
								a. 3 cells (37,5%) have expected count less than 5. The minimum expected count is ,40.																								a. 0 cells (0,0%) have expected count less than 5. The minimum expected count is 5,15.									a. 4 cells (40,0%) have expected count less than 5. The minimum expected count is ,40.
								Wave * Focal_plasma_impregnation Crosstabulation																								Wave * Myocardial_hypertrophy Crosstabulation									Wave * Edema_with_fibrin Crosstabulation
								Count																								Count									Count
										Focal_plasma_impregnation				Total																				Myocardial_hypertrophy					Total				Edema_with_fibrin				Total
										0 point	2 points	3 points	4 points																					0 point	1 point	2 points	3 points	4 points					0 point	2 points	3 points	4 points
								Wave	Wave 1	67	0	2	8	77																		Wave	Wave 1	41	0	4	9	23	77		Wave	Wave 1	71	0	0	6	77
									Wave 3	63	6	9	0	78																			Wave 3	25	5	12	19	17	78			Wave 3	65	3	10	0	78
								Total		130	6	11	8	155																		Total		66	5	16	28	40	155		Total		136	3	10	6	155
								Chi-Square Tests																								Chi-Square Tests									Chi-Square Tests
									Value	df	Asymptotic Significance (2-sided)																						Value	df	Asymptotic Significance (2-sided)							Value	df	Asymptotic Significance (2-sided)
								Pearson Chi-Square	18,572a	3	0.000335164																					Pearson Chi-Square	17,344a	4	0.00165661						Pearson Chi-Square	19,259a	3	0.000241667
								Likelihood Ratio	24.3429	3	2.11825e-05																					Likelihood Ratio	19.5836	4	0.000603342						Likelihood Ratio	26.5979	3	7.14808e-06
								N of Valid Cases	155																							N of Valid Cases	155								N of Valid Cases	155
								a. 4 cells (50,0%) have expected count less than 5. The minimum expected count is 2,98.																								a. 2 cells (20,0%) have expected count less than 5. The minimum expected count is 2,48.									a. 5 cells (62,5%) have expected count less than 5. The minimum expected count is 1,49.
								in the first wave of coronavirus infection, the focal plasma impregnation was more pronounced than in the second and third, p=0,0064																								in the first wave of coronavirus infection, cardiomyocyte hypertrophy was less pronounced than in the second and third waves, p=0,002									in the first wave of coronavirus infection, edema with fibrin was less pronounced than in the second and third waves, p=2,4E-04
Statistically significant morphological changes in the course of coronavirus infection
1	in the third wave of coronavirus infection, the focal plasma impregnation was more pronounced than in the second and first, p=0,0064
1	in the first wave of coronavirus infection, cardiomyocyte hypertrophy was less pronounced than in the second and third waves, p=0,002
1	in the first wave of coronavirus infection, edema with fibrin was less pronounced than in the second and third waves, p=2,4E-04
1	in the third wave of coronavirus infection, postinfarction cardiosclerosis was less pronounced than in the first and second waves, p=0,008
1	in the first wave of coronavirus infection, thrombi in the arteries was more pronounced than in the second and third waves, p=0,013
1	in the second wave of coronavirus infection, vasculitis was less pronounced than in the first and third waves, p=0,008
1	the number of macrophages in the myocardial stroma was the highest in the second wave, p=0,017, in the third wave of macrophages it became less than in the second and first waves, p=0,008
1	in the third wave of coronavirus infection, we observed less necrosis of cardiomyocytes than in the first wave, p=0,004
1	patients with lymphocytic myocarditis in the second wave was 13,7 (1,7; 111,1) times less than in the first, p=0,002, and 8,9 (0,9; 71,5) times less than in the third, p=0,025
1	There were more large polymorphic cells located in the vascular zone in the first wave of coronavirus infection than in the second and third waves, p=4,96E-14
Data for charts
	First wave	Second wave	Third wave
focal plasma impregnation	0.13	0.08	0.19
myocardial hypertrophy	0.47	0.69	0.68
edema with fibrin	0.08	0.24	0.17
postinfarction cardiosclerosis	0.19	0.26	0.09
thrombi in the arteries	0.12	0.07	0
vasculitis	0.09	0.01	0.01
macrophages	0.25	0.21	0.06
necrosis of cardiomyocytes	0.18	0.11	0.04
lymphocytic myocarditis	0.1	0.01	0.06
large polymorphic cells	0.56	0.01	0.01
[truncated: 77 more columns]
